# Genome-scale reconstructions of the mammalian secretory pathway predict metabolic costs and limitations of protein secretion

Jahir M. Gutierrez<sup>1,2,\*</sup>, Amir Feizi<sup>3,\*</sup>, Shangzhong Li<sup>1,2</sup>, Thomas B. Kallehauge<sup>4</sup>, Hooman Hefzi<sup>1,2</sup>, Lise M. Grav<sup>4</sup>, Daniel Ley<sup>4,5</sup>, Deniz Baycin Hizal<sup>6</sup>, Michael J. Betenbaugh<sup>7</sup>, Bjorn Voldborg<sup>4</sup>, Helene Fastrup Kildegaard<sup>4</sup>, Gyun Min Lee<sup>4</sup>, Bernhard O. Palsson<sup>1,2,4,8</sup>, Jens Nielsen<sup>3,4</sup> & Nathan E. Lewis<sup>2,8</sup>

<sup>1</sup>Department of Bioengineering, University of California, San Diego, La Jolla, CA 92093, United States

<sup>2</sup>Novo Nordisk Foundation Center for Biosustainability at the University of California, San Diego, School of Medicine, La Jolla, CA 92093, United States

<sup>3</sup>Department of Biology and Biological Engineering, Kemivägen 10, Chalmers University of Technology, SE41296 Gothenburg, Sweden

<sup>4</sup>Novo Nordisk Foundation Center for Biosustainability, Technical University of Denmark, 2800 Kgs. Lyngby, Denmark.

<sup>5</sup>Department of Systems Biology, Technical University of Denmark, Kongens Lyngby, Denmark

<sup>6</sup>Pharmaceutical R&D Department, Turgut Iblaclari A.S., Istanbul, Turkey

<sup>7</sup>Department of Chemical & Biomolecular Engineering, Johns Hopkins University, Baltimore, MD 21218-2686, United States

<sup>8</sup>Department of Pediatrics, University of California, San Diego, School of Medicine, La Jolla, CA 92093, United States.

\* These authors contributed equally

Correspondence and requests for materials should be addressed to N.E.L. (email: [nlewisres@ucsd.edu](mailto:nlewisres@ucsd.edu))

## Abstract

In mammalian cells, >25% of synthesized proteins are exported through the secretory pathway. The pathway complexity, however, obfuscates its impact on the secretion of different proteins. Unraveling its impact on diverse proteins is particularly important for biopharmaceutical production. Here we delineate the core secretory pathway functions and integrate them with genome-scale metabolic reconstructions of human, mouse, and Chinese hamster cells. The resulting reconstructions enable the computation of energetic costs and machinery demands of each secreted protein. By integrating additional omics data, we find that highly secretory cells have adapted to reduce expression and secretion of other expensive host cell proteins. Furthermore, we predict metabolic costs and maximum productivities of biotherapeutic proteins and identify protein features that most significantly impact protein secretion. Finally, the model successfully predicts the increase in secretion of a monoclonal antibody after silencing a highly expressed selection marker. This work represents a knowledgebase of the mammalian secretory pathway that serves as a novel tool for systems biotechnology.

## Keywords

Metabolic network, secretory pathway, biotherapeutic production, systems biotechnology

## 38 Introduction

39 To interact with their environment, cells produce numerous signaling proteins, hormones, receptors,  
40 and structural proteins. In mammals, these include at least 2,641 secreted proteins (e.g., enzymes,  
41 hormones, antibodies, extracellular matrix proteins) and >5,500 membrane proteins<sup>1</sup>, most of which are  
42 synthesized and processed in the secretory pathway.

43 The secretory pathway consists of a complex series of processes that predominantly take place in the  
44 endoplasmic reticulum (ER), Golgi apparatus, and the endomembrane system. This pathway is particularly  
45 important in biotechnology and the biopharmaceutical industry, since most therapeutic proteins are  
46 produced in mammalian cell lines such as HEK293, PerC6, NS0, and Chinese hamster ovary (CHO) cells,  
47 which are capable of folding and adding the necessary post-translational modifications (PTMs) to the  
48 target product<sup>2</sup>. For any given biotherapeutic, different machinery in the secretory pathway may be  
49 needed, and each step can exert a non-negligible metabolic demand on the cells. The complexity of this  
50 pathway, however, makes it unclear how the biosynthetic cost and cellular needs vary for different  
51 secreted proteins, each of which exerts different demands for cellular resources. Therefore, a detailed  
52 understanding of the biosynthetic costs of the secretory pathway could guide efforts to engineer host  
53 cells and bioprocesses for any desired product. The energetic and material demands of the mammalian  
54 secretory pathway can be accounted for by substantially extending the scope of metabolic models.  
55 Indeed, recent studies have incorporated portions of the secretory pathway in metabolic models of yeast  
56 <sup>3-5</sup>. Furthermore, Lund and colleagues reconstructed a genetic interaction network of the mouse secretory  
57 pathway and the unfolded protein response and analyzed it in the context of CHO cells<sup>6</sup>. However, such a  
58 network does not encompass a stoichiometric reconstruction of the biochemical reactions involved in the  
59 secretory pathway nor it is coupled to existing metabolic networks of mammalian cells.

60 Here we present the first genome-scale stoichiometric reconstructions and computational models of  
61 mammalian metabolism coupled to protein secretion. Specifically, we constructed these for human,  
62 mouse, and CHO cells, called RECON2.2s, IMM1685s, and iCHO2048s, respectively. We first derive an  
63 expression for computing the energetic cost of synthesizing and secreting a product in terms of molecules  
64 of ATP equivalents per protein molecule. We use this expression and analyze how the energetic burden  
65 of protein secretion has led to an overall suppression of more expensive secreted host cell proteins in  
66 mammalian cells. Given its dominant role in biotherapeutic production, we further focus on the  
67 biosynthetic capabilities of CHO cells. We then demonstrate that product-specific secretory pathway  
68 models can be built to estimate CHO cell growth rates given the specific productivity of the recombinant

69 product as a constraint. We identify the features of secreted proteins that have the highest impact on  
70 protein cost and productivity rates. Finally, we use our model to identify proteins that compete for cell  
71 resources, thereby presenting targets for cell engineering. Through this study we demonstrate that a  
72 systems-view of the secretory pathway now enables the analysis of many biomolecular mechanisms  
73 controlling the efficacy and cost of protein expression in mammalian cells. We envision our models as  
74 valuable tools for the study of normal physiological processes and engineering cell bioprocesses in  
75 biotechnology. All models and data used in this study are freely available at  
76 <https://github.com/LewisLabUCSD/MammalianSecretoryRecon>.

77

## 78 **RESULTS**

### 79 **A stoichiometric expression of protein secretion energetics**

80 In any cell, the secretory machinery is concurrently processing thousands of secreted and membrane  
81 proteins, which all compete for secretory pathway resources and pose a metabolic burden. To quantify  
82 this burden, we estimated the energetic cost of synthesizing and/or secreting 5,641 and 3,538  
83 endogenous proteins in the CHO and human secretome and membrane proteome in terms of total  
84 number of ATP equivalent molecules consumed (see Methods). These protein costs were compared to  
85 the cost of five recombinant proteins commonly produced in CHO cells (Fig. 1a). To refine estimates, we  
86 predicted signal peptides<sup>7</sup>, GPI anchor attachment signals<sup>8</sup>, and experimentally measured the number of  
87 N-linked glycans in the CHO proteome and integrated published numbers of O-linked glycans in CHO  
88 proteomic data<sup>9</sup>. Across the CHO secretome, protein synthesis cost varies substantially, and recombinant  
89 products are on average more expensive (Fig. 1a). For example, Factor 8 (F8) is a difficult-to-express  
90 protein in CHO cells due to its propensity to aggregate in the ER, which promotes its premature  
91 degradation<sup>10,11</sup>. Our analysis further highlights that each molecule of F8 requires a large amount of ATP  
92 for its production (9,488 ATP molecules). This imposes a significant burden to the secretory machinery of  
93 CHO cells, which typically expresses much less expensive endogenous proteins.

94

### 95 **Recombinant cells suppress expression of expensive proteins**

96 With the broad range of biosynthetic costs for different proteins, we wondered if gene expression in  
97 mammalian cells that are tasked with high levels of protein secretion have been influenced by the ATP  
98 cost of secreted proteins. That is, have these secretory cells suppressed their protein expression to more  
99 efficiently allocate nutrients? To test this, we first looked at CHO cells, which have undergone extensive

100 selection to obtain cells that secrete recombinant proteins at high titer, and then compared different  
101 human tissues with a range of secretory capacity.

102 Unless specific proteins are essential, CHO cells may preferentially suppress energetically  
103 expensive proteins. Thus, we analyzed ribosomal profiling (Ribo-Seq) data from a recombinant CHO cell  
104 line<sup>12</sup> and compared translation of each transcript against the ATP cost of the associated secreted protein  
105 (see Methods). Indeed, there was a significant negative correlation of -0.43 (Spearman  $R_s$ ,  $p$  value  $< 1 \times 10^{-20}$ )  
106 between ribosomal occupancy and ATP cost during early exponential growth phase of culture (Fig. 1b).  
107 Wondering if the reduced translation was regulated transcriptionally, we further analyzed RNA-Seq data  
108 from the same recombinant cell line and from another, non-recombinant CHO-K1 cell line<sup>13</sup>. The RNA  
109 expression also negatively correlated with ATP cost (see Supplementary Figure 2).

110 To evaluate if this is a general trend seen in mammalian secretory cells, we analyzed RNA-Seq  
111 data from human tissues and immortalized cell lines in the Human Protein Atlas (HPA)<sup>1</sup>. For all RNA-Seq  
112 datasets in the HPA, there was a negative correlation between mRNA expression levels and ATP cost (Fig.  
113 1D). Interestingly, we found that highly secretory tissues such as liver, pancreas and salivary gland had the  
114 strongest correlations, although none as strong as that of the recombinant CHO cells, which have  
115 undergone selection of high secretion. Feizi and colleagues recently found that these tissues fine-tune the  
116 expression of protein disulfide isomerase genes<sup>14</sup>, suggesting that a similar regulatory process may take  
117 place in the ER of CHO cells as the secreted monoclonal antibody (mAb) contains a relatively high number  
118 (17) of disulfide bonds. In conclusion, there is a clear preference in CHO and native secretory tissues to  
119 suppress the expression and translation of proteins that are costly to synthesize, fold, and secrete.

120

## 121 **In silico reconstruction of the mammalian secretory pathway**

122 We mapped out the core processes involved in the synthesis of secreted and membrane proteins in  
123 mammalian cells (i.e., human, mouse, and Chinese hamster). This included 261 components (gene  
124 products) in CHO cells and 271 components in both human and mouse. The components are involved in  
125 secretory reactions across 12 subsystems (i.e., functional modules of the secretory pathway; Fig. 2a).  
126 These components represent the core secretory machinery needed in the transition of a target protein  
127 from its immature state in the cytosol (i.e., right after translation) to its final form (i.e., when it contains  
128 all post-translational modifications and is secreted to the extracellular space). Each component in the  
129 reconstruction either catalyzes a chemical modification on the target protein (e.g., N-linked glycosylation  
130 inside ER lumen/Golgi) or participates in a multi-protein complex that promotes protein folding and/or  
131 transport. This distinction between catalytic enzymes and complex-forming components is important for

132 modeling purposes as a catalytic component consumes or produces metabolites that are directly  
133 connected to the metabolic network (e.g., ATP, sugar nucleotides). Because all components of the core  
134 secretory pathway were conserved across human, mouse and hamster (Fig. 2b), we generated species-  
135 specific secretory pathway reconstructions and used them to expand the respective genome-scale  
136 metabolic networks (Recon 2.2<sup>15</sup>, iMM1415<sup>16</sup>, iCHO1766<sup>17</sup>). Following the naming convention of their  
137 metabolic counterparts, we named these new metabolic-secretory reconstructions as follows: iMM1685s,  
138 iCHO2048s, and Recon 2.2s, which account for 1685, 2048, and 1946 genes, respectively. A detailed list of  
139 the components, reactions and the associated genes can be found in the Supplementary Data 1.

140

### 141 **Validation of iCHO2048s growth and productivity predictions**

142 We first validated the accuracy of iCHO2048s predictions using growth and specific productivity rates  
143 of IgG-producing CHO cell lines from two independent studies<sup>12,18</sup>. For this, we built an IgG-secreting  
144 iCHO2048s model using the information in the PSIM matrix for the therapeutic mAb Rituximab. We then  
145 constrained the model's Rituximab-specific secretory pathway with the reported productivity value in  
146 each study and used FBA to predict growth (Fig. 3a). Later, to assess the ability of iCHO2048s to predict  
147 growth rates in cases when CHO cells are producing non-antibody proteins, we collected data from two  
148 batch culture experiments using Enbrel- and C1-inhibitor-producing isogenic CHO cell lines. We  
149 constructed two iCHO2048s models for each case and predicted growth rates during the early exponential  
150 growth phase of culture while constraining the protein secretion rate to the measured specific  
151 productivity value (Fig. 3b). The model predictions agreed well with the reported and measured values.  
152 There were cases where iCHO2048s predicted a much higher growth rate than what was measured in the  
153 first days of batch culture (Fig. 3b). Since FBA computes theoretical maximum growth rates given a set of  
154 constraints, these over-prediction cases point at situations where CHO cells do not direct resources  
155 towards biomass production (during very early stages of culture), a discrepancy that is attenuated in later  
156 stages of culture. In conclusion, these results confirm the ability of protein-specific reconstructions to  
157 capture the specific energetic requirements that each recombinant product imposes on CHO cell  
158 metabolism.

159

### 160 **Protein composition impacts predicted productivity**

161 To produce a specific product, CHO cells may utilize different modules of the secretory pathway based  
162 on the protein attributes and post-translational modifications (PTMs). For example, the synthesis of a mAb  
163 requires the use of multiple processes and consumes several different metabolites, such as amino acids

164 for protein translation, redox equivalents for forming disulfide bonds, ATP equivalents for vesicular  
165 transport, and sugar nucleotides for protein glycosylation (Fig. 2c). Therefore, we generated eight  
166 product-specific secretory pathway models for biotherapeutics commonly produced in CHO cells (Fig. 4a):  
167 bone morphogenetic proteins 2 and 7 (BMP2, BMP7), erythropoietin (EPO), Enbrel, factor VIII (F8),  
168 interferon beta 1a (IFNB1), Rituximab, and tissue plasminogen activator (tPA). The resulting iCHO2048s  
169 models were used to compute Pareto optimality frontiers between maximum cell growth ( $\mu$ ) and specific  
170 productivity ( $q_p$ ), given the same measured glucose and amino acid uptake rates for each model<sup>17</sup> (see  
171 Supplementary Data 3).

172 We computed the tradeoff between growth rate (hours<sup>-1</sup>) and specific productivity (picogram of  
173 protein produced per cell per day, or PCD) as a Pareto optimal curve for each protein (Fig. 4b). This curve  
174 defines the frontier of maximum specific productivity and maximum growth rates under the assumption  
175 that CHO cells can utilize all available resources towards production of biomass and recombinant protein  
176 only. The hinges in some of the curves are indicative of a transition between regions that are limited by  
177 distinct protein requirements (e.g., amino acids).

178 An analysis of the Pareto optimal curves for the eight biotherapeutics demonstrates that under the  
179 measured growth conditions, maximum productivities vary from 20-100 PCD at common growth rates  
180 (Fig. 4b, shaded region) to 70-150 PCD for senescent CHO cells. Neither the molecular weight (MW) nor  
181 product length can explain the 2-fold range differences in maximum productivity for different proteins.  
182 For example, the curves show tPA (MW = 61,917 Da) can express at higher PCD than BMP2 (MW = 44,702  
183 Da) despite being larger, because the N-glycans in BMP2 reduce productivity due to the higher cost of  
184 synthesizing core N-glycans (see Table 1), consistent with previous observations in yeast<sup>5</sup>. Furthermore,  
185 the degree and directionality of these effects will depend on the nutrient uptake rates (Figure 4c and  
186 Supplementary Figure 1), highlighting the need in CHO bioprocessing to tailor culture media in a host cell  
187 and product-specific manner. Thus, while intuitively larger proteins would be expected to exert more  
188 bioenergetic cost on protein secretion, we find that specific compositional attributes of both the  
189 recombinant protein and the culture media significantly impact biosynthetic capacity. An in-depth analysis  
190 of the effects of PTMs on predicted productivities is provided in Jupyter Notebook C.

191 To further evaluate what functions of the secretory pathway had the greatest impact on the cost of  
192 protein synthesis and secretion, we computed secretion rates for 5,461 proteins in the CHO secretome  
193 (see Methods) using iCHO2048s and its parent metabolic reconstruction iCHO1766<sup>17</sup>. While iCHO2048s  
194 captures all the required steps for protein synthesis, modification and secretion, the secretion reactions  
195 in iCHO1766 only account for the basic synthesis of the target protein in cytoplasm, and the synthesis of

196 necessary precursors (N-linked glycans, O-linked glycans, and GPI anchors). We found that secretory  
197 pathway had non-negligible costs on most proteins (Supplementary Figure 3b). Furthermore, protein  
198 features associated with secreted proteins that differ in cost by >15% beyond the amino acid and glycan  
199 costs show a statistical enrichment (under the Hypergeometric test) for O-linked glycans ( $p = 0.0065$ ), GPI  
200 anchors ( $p = 0.0216$ ), transmembrane domains ( $p = 0.0326$ ), and proteins destined to the ER lumen  
201 ( $p=0.0142$ ), the Golgi membrane ( $p = 0.0065$ ), or the plasma membrane ( $p = 0.0186$ , see Supplementary  
202 Figure 3d and Jupyter Notebook E). Thus, these PTMs and transmembrane domains exert additional costs  
203 to their demands.

204

### 205 **iCHO2048s recapitulates results following gene knock-down**

206 In a recent study, Kallehauge et al.<sup>12</sup> demonstrated that a CHO-DG44 cell line producing an antiviral  
207 mAb<sup>19</sup> also expressed high levels of the *neoR* selection-marker gene (Fig. 5a-b). Upon *neoR* knockdown,  
208 the titer and maximum viable cell densities of the CHO-DG44 cell line were increased. To test if iCHO2048s  
209 could replicate these results, we constructed a model for the Kallehauge et al. DG44 cell line and measured  
210 exometabolomics, and dry cell weight to parameterize the model. Since expression of *neoR* uses resources  
211 that could be used for antibody production, we predicted how much additional antibody could be  
212 synthesized with the elimination of the *neoR* gene. We simulated antibody production following a  
213 complete knockout of *neoR* (see Table 2 and Fig. 5b) and predicted that the deletion of *neoR* could  
214 increase specific productivity by up to 4% and 29% on days 3 (early exponential phase) and 6 (late phase)  
215 of culture, respectively (Fig. 5c). This was qualitatively consistent with the experimentally observed values  
216 of 2% and 14% when *neoR* mRNA was knocked down by 80-85%. We then computed the Pareto optimality  
217 curves for both the control and the *neoR* in silico knockout conditions on day 6. We found that the length  
218 of the curve (denoted by  $\Delta$ ) increased by 18% when *neoR* production is eliminated (Fig. 5d). Thus,  
219 iCHO2048s can quantify how much non-essential gene knockouts can boost growth and productivity in  
220 CHO cells by freeing energetic and secretory resources. In fact, the ribosome-profiling data from  
221 Kallehauge et al. revealed that only 30 secretory proteins in CHO cells account for more than 50% of the  
222 ribosomal load directed towards translation of protein bearing a signal peptide (Fig. 4E). Indeed, we  
223 recently found that substantial resources can be liberated and recombinant protein titers can be increased  
224 when 14 high-abundance host cell proteins were knocked out<sup>20</sup>. An analysis of other potential host cell  
225 gene knockouts using the method proposed here can be found in Supplementary Data 4.

226

## 227 Discussion

228 Mammalian cells synthesize and process thousands of proteins through their secretory pathway.  
229 Many of these proteins, including hormones, enzymes, and receptors, are essential for mediating  
230 mammalian cell interactions with their environment. Therefore, many have therapeutic importance either  
231 as drugs or as targets. The expression and secretion of recombinant proteins represents a significant  
232 anabolic demand that drains several substrates from cellular metabolism (e.g., amino acids, sugar  
233 nucleotides, ATP)<sup>21,22</sup>. Furthermore, the recombinant proteins demand adequate expression of supporting  
234 proteins involved in their transcription, translation, folding, modification, and secretion. Thus, there has  
235 been an increasing interest in engineering the mammalian secretory pathway to boost protein  
236 production<sup>23-26</sup>. Despite important advances in the field<sup>27</sup>, current strategies to engineer the secretory  
237 pathway have remained predominantly empirical<sup>28,29</sup>. Recent modeling approaches, however, have  
238 enabled the analysis of the metabolic capabilities of important eukaryotic cells under different genetic  
239 and environmental conditions<sup>17,30-32</sup>. With the development of genome-scale models of protein-producing  
240 cells, such as CHO<sup>17</sup>, HEK-293<sup>33</sup> and hybridomas<sup>34,35</sup>, it is now possible to gain a systems-level  
241 understanding of the mammalian protein production phenotype<sup>36</sup>.

242  
243 Efforts have been underway to enumerate the machinery needed for protein production. For  
244 example, Lund and colleagues<sup>6</sup> recently reconstructed a comprehensive genetic network of the mouse  
245 secretory pathway. By comparing the mouse and CHO-K1 genomes and mapping CHO gene expression  
246 data onto this network, the authors identified potential targets for CHO cell engineering, demonstrating  
247 the potential of systems biology to interrogate and understand protein secretion in animal cells. This  
248 genetic network reconstruction, although useful for contextualizing omics data (e.g., RNA-Seq), is not set  
249 up for simulations of protein production, nor integrated with additional cellular processes such as  
250 metabolism. Therefore, our work is complementary in that it allows one to also to quantify the cost and  
251 cellular capacity for protein production by delineating the mechanisms of all biosynthetic steps and  
252 bioenergetic processes in the cell.

253  
254 Here we presented the first genome-scale reconstruction of the secretory pathway in mammalian  
255 cells coupled to metabolism. We connected this to current metabolic networks, yielding models of protein  
256 secretion and metabolism for human, mouse and CHO cells. These models compile decades of research  
257 in biochemistry and cell biology of higher eukaryotes and present it in a mathematical model. Using our  
258 model, we quantitatively estimated the energetic cost of producing several therapeutic proteins and all



259 proteins in the CHO cell and human secretomes. We also identified factors limiting the secretion of  
260 individual products and observed that these depend on both the complexity of the product and the  
261 composition of the culture media. Furthermore, by integrating ribosomal profiling data with our model  
262 we found that CHO cells have selectively suppressed the expression of energetically expensive secreted  
263 proteins. Expanding upon this observation, we demonstrated that specific productivities can be  
264 predictably increased following the knock-down of an energetically expensive, non-essential protein.  
265 Furthermore, consistent with this, we have recently shown more than 50% reductions in total host cell  
266 protein production, along with increases in mAb titer when deleting 14 highly abundant proteins in CHO  
267 cells. Further studies will likely further explore how much of the CHO cell proteome can be deleted to  
268 further enhance recombinant protein secretion<sup>20</sup>.

269  
270 It is important to note that while our models capture major features of secreted proteins, there are  
271 additional PTMs (e.g., phosphorylation, gamma carboxylation), pathway machinery (e.g., chaperones),  
272 and cell processes that could possibly be captured in further expansions of the modeling framework<sup>6</sup> (e.g.,  
273 the unfolded protein response). These could be included as energetic costs associated with building and  
274 maintaining the secretory machinery (chaperones<sup>3</sup>, disulfide oxidoreductases<sup>37</sup>, glycosyltransferases<sup>38</sup>);  
275 protein stability and turnover rates<sup>39</sup>; solubility constraints<sup>40</sup> and molecular crowding effects<sup>41</sup>. As these  
276 are captured by the models in a protein product-specific manner, predictions of protein production  
277 capacity will improve, and the models could provide further insights for cell engineering for biotechnology  
278 or to obtain a deeper understanding of mechanisms underlying amyloid diseases. Finally, a simplification  
279 of our secretory model is that it only computes the bioenergetic cost of synthesizing and attaching single  
280 representative N- and O-linked glycans to secreted proteins (i.e., it does not include the  
281 microheterogeneity and diversity of glycan structures of different proteins). Thus, an immediate potential  
282 expansion of our secretory model would involve coupling it to existing computational models of protein  
283 glycosylation<sup>42,43</sup>. For example, given an N-glycan reaction network that captures the glycoform  
284 complexity of a target protein<sup>44</sup>, one could build secretory reactions for the specific glycoforms of interest  
285 and compute the metabolic demands associated with each of them to identify potential targets and  
286 nutrient supplementations for glycoengineering.

287  
288 In conclusion, the results of our study have important implications regarding the ability to predict  
289 protein expression based on protein specific attributes and energetic requirements. The secretory  
290 pathway models here stand as novel tools to study mammalian cells and the energetic trade-off between

291 growth and protein secretion in a product- and cell-specific manner. We presented algorithms that  
292 provide novel insights with our models, and expect that many other methods can be developed to answer  
293 a wide array of questions surrounding the secretory pathway, as seen for metabolism<sup>45</sup>. To facilitate  
294 further use of these models, we provide our code and detailed instructions on how to construct protein-  
295 specific models in the Jupyter Notebooks available at  
296 <https://github.com/LewisLabUCSD/MammalianSecretoryRecon>.

297

## 298 **Methods**

### 299 **Reconstruction of the mammalian secretory pathway**

300 A list of proteins and enzymes in the mammalian secretory pathway was compiled from literature  
301 curation, UniProt, NCBI Gene, NCBI Protein and CHOgenome.org (see Supplementary Data 1). To facilitate  
302 the reconstruction process, the secretory pathway was divided into twelve subsystems or functional  
303 modules (Fig. 1) to sort the components according to their function. These subsystems correspond to the  
304 major steps required to process and secrete a protein. The components from a prior yeast secretory  
305 pathway reconstruction<sup>3</sup> were used as a starting reference. To build species-specific models, orthologs for  
306 human, mouse and the Chinese hamster were identified and used, while yeast components and  
307 subsystems that are not present in the mammalian secretory pathway were removed. Additional  
308 subsystems were added when unique to higher eukaryotes, such as the calnexin-calreticulin cycle in the  
309 ER<sup>46</sup>. These were constructed de novo and added to the reconstruction. The databases and literature were  
310 then consulted to identify the remaining components involved in each subsystem of the mammalian  
311 secretory pathway. Since most components in the mammalian secretory pathway have been identified in  
312 mouse and human, BLAST was utilized to identify the corresponding Chinese hamster orthologs by setting  
313 human as the reference organism and a cutoff of 60% of sequence identity. See Supplementary Discussion  
314 for an overview of the mammalian secretory pathway and its comparison with the yeast secretory  
315 pathway.

316

### 317 **Protein Specific Information Matrix (PSIM)**

318 The PSIM (Supplementary Data 2) contains the necessary information to construct a protein-specific  
319 secretory model from the template reactions in our reconstruction. The columns in the PSIM are presence  
320 of a signal peptide (SP), number of disulfide bonds (DSB), presence of Glycosylphosphatidylinositol (GPI)  
321 anchors, number of N-linked (NG) and O-linked (OG) glycans, number of transmembrane domains (TMD),

322 subcellular location, protein length, and molecular weight. For most proteins, the information in the PSIM  
323 was obtained from the Uniprot database. When necessary, computational tools were used to predict  
324 signal peptides (PrediSi<sup>7</sup>) and GPI anchors (GPI-SOM<sup>8</sup>). Finally, additional information on the number of  
325 O-linked glycosylation sites of certain proteins were obtained from experimental data in previous  
326 studies<sup>9,47</sup>. The PSIMs of the CHO and human secretomes are a subset of the full PSIM and contains only  
327 the proteins with a signal peptide (predicted or confirmed in Uniprot). The distribution of all PTMs across  
328 the human, mouse and CHO proteomes can be found in Jupyter Notebook D. For analyzing secretomes, a  
329 total of 3378 human proteins were picked based on the presence of a signal peptide in their sequence  
330 according to their annotation in the UniProt database. Similarly, 5,641 CHO proteins were picked based  
331 on the presence of a signal peptide in their sequence and/or for being localized in the cell membrane  
332 according to the UniProt database.

333

### 334 **Detection of N-linked glycosylation sites in CHO proteome**

335 The number of N-linked glycosylation sites in the PSIM was determined computationally and  
336 experimentally as follows. CHO-K1 cells (ATCC) were lysed, denatured, reduced, alkylated and digested by  
337 trypsin. Desalted peptides were incubated with 10 mM sodium periodate in dark for 1 hour before  
338 coupling to 50  $\mu$ L of (50% slurry) hydrazide resins. After incubation overnight, non-glycosylated peptides  
339 were washed with 1.5 M NaCl and water. The N-glycosylated peptides were released with PNGaseF at 37  
340  $^{\circ}$ C and desalted by using a C18 SepPak column. Strong cation exchange (SCX) chromatography was used  
341 to separate the sample into 8 fractions. Each fraction was analyzed on an LTQ-Orbitrap Velos (Thermo  
342 Electron, Bremen, Germany) mass spectrometer. During the mass spectrometry data analysis,  
343 carbamidomethylation was set as a fixed modification while oxidation, pyroglutamine and deamidation  
344 were variable modifications.

345

### 346 **Construction of models and constraint-based analysis**

347 We wrote a Jupyter Notebook in Python (see Jupyter Notebook A) that takes a row from the PSIM as  
348 input to produce an expanded iCHO2048s, Recon 2.2s, or iMM1685s metabolic model with the product-  
349 specific secretory pathway of the corresponding protein. Flux balance analysis (FBA<sup>48</sup>) and all other  
350 constraint-based analyses were done using the COBRA toolbox v2.0<sup>49</sup> in MATLAB R2015b and the Gurobi  
351 solver version 6.0.0. The analyses in Figs. 2, 3, and 4 were done using the constraints in the Supplementary  
352 Data 3. For the iCHO2048s models secreting human proteins, we set the same constraints in all models  
353 and computed the theoretical maximum productivity ( $max_{qp}$ ) while maintaining a growth rate (in units of

354 inverse hours) of 0.01. Finally, since the exact glycoprofiles of most proteins in CHO are unknown and  
355 some even change over time in culture<sup>50</sup>, we simplified our models by only adding the core N-linked and  
356 O-linked glycans to the secreted proteins.

357

### 358 **Batch cultivation**

359 Two isogenic CHO-S cell lines (Thermo Fisher Scientific, USA) adapted to grow in suspension, one  
360 producing Enbrel (Etanercept) and the other producing human plasma protease C1 inhibitor (C1INH),  
361 were seeded at  $3 \times 10^5$  cells per mL in 60 mL CD-CHO medium (Thermo Fisher Scientific, USA)  
362 supplemented with 8 mM L-Glutamine (Lonza) and 1  $\mu$ L per mL anti-clumping agent (Life Technologies),  
363 in 250 mL Erlenmeyer shake flasks. Cells were incubated in a humidified incubator at 37°C, 5% CO<sub>2</sub> at 120  
364 rpm. Viable cell density and viability were monitored every 24 hours for 7 days using the NucleoCounter  
365 NC-200 Cell Counter (ChemoMetec). Daily samples of spent media were taken for extracellular metabolite  
366 concentration and titer measurements by drawing 0.8 mL from each culture, centrifuging it at 1000 g for  
367 10 minutes and collecting the supernatant and discarding the cell pellet.

368

### 369 **Titer determination**

370 To quantify Enbrel and C1INH titers, biolayer interferometry was performed using an Octet RED96  
371 (Pall Corporation, Menlo Park, CA). ProA biosensors (Fortebio 18-5013) were hydrated in PBS and  
372 preconditioned in 10 mM glycine pH 1.7. A calibration curve was prepared using Enbrel (Pfizer) or C1INH  
373 at 200, 100, 50, 25, 12.5, 6.25, 3.13, 1.56, 0.78  $\mu$ g per ml. Culture spent media samples were collected  
374 after centrifugation and association was performed for 120 s with a shaking speed of 200 rpm at 30 °C.  
375 Octet System Data Analysis 7.1 software was used to calculate binding rates and absolute protein  
376 concentrations.

377

### 378 **Extracellular metabolite concentration measurements**

379 The concentrations of glucose, lactate, ammonium (NH<sub>4</sub><sup>+</sup>), and glutamine in spent media were  
380 measured using the BioProfile 400 (Nova Biomedical). Amino acid concentrations were determined via  
381 High Performance Liquid Chromatography using the Dionex Ultimate 3000 autosampler at a flow rate of  
382 1mL per minute. Briefly, samples were diluted 10 times using 20  $\mu$ L of sample, 80  $\mu$ L MiliQ water, and 100  
383  $\mu$ L of an internal amino acid standard. Derivatized amino acids were monitored using a fluorescence  
384 detector. OPA-derivatized amino acids were detected at 340ex and 450em nm and FMOC-derivatized  
385 amino acids at 266ex and 305em nm. Quantifications were based on standard curves derived from

386 dilutions of a mixed amino acid standard (250 ug per mL). The upper and lower limits of quantification  
387 were 100 and 0.5 ug per mL, respectively.

388

### 389 **Estimation of protein secretion cost**

390 We estimated the energetic cost of synthesizing and secreting all 5,641 endogenous CHO cell proteins  
391 and 3,538 endogenous human proteins. These proteins were chosen for containing a signal peptide in  
392 their sequence and/or for being localized in the cell membrane (according to the UniProt database). The  
393 energetic cost (in units of number of ATP equivalents) of secreting each protein (length L) was computed  
394 using the following formulas and assumptions.

395 Energy cost of translation: For each protein molecule produced, 2L ATP molecules are cleaved to AMP  
396 during charging of the tRNA with a specific amino acid; 1 GTP molecule is consumed during initiation and  
397 1 GTP molecule for termination; L-1 GTP molecules are required for the formation of L-1 peptide bonds;  
398 L-1 GTP molecules are necessary for L-1 ribosomal translocation steps. Thus, the total cost of translation  
399 (assuming no proofreading) is 4L.

400 Average cost of signal peptide degradation: On average, signal peptides have a length of 22 amino acids.  
401 Thus, the average cost of degrading all peptide bonds in the signal peptide is 22. This average cost was  
402 assigned to all proteins analyzed.

403 Energetic cost of translocation across the ER membrane: During activation of the translocon, 2 cytosolic  
404 GTP molecules are hydrolyzed. From there, a GTP molecule bound to the folding-assisting chaperone BiP  
405 is hydrolyzed to GDP for every 40 amino acids that pass through the translocon pore<sup>46</sup>. Thus, the cost of  
406 translocation is  $(L \div 40) + 2$ .

407 Energetic cost of vesicular transport and secretion: We used published data<sup>51-53</sup> (see Supplementary Data  
408 1) to compute stoichiometric coefficients for reactions involving vesicular transport. That is, the number  
409 of GTP molecules bound to RAB and coat proteins in each type of vesicle (COPII and secretory vesicles).  
410 We found that a total of 192 and 44 GTPs must be hydrolyzed to transport one COPII or secretory (i.e.  
411 clathrin coated) vesicle from the origin membrane to the target membrane, respectively. Since vesicles  
412 do not transport a single protein molecule at a time, we estimated the number of secreted protein  
413 molecules that would fit inside a spherical vesicle (see estimated and assumed diameters in the  
414 Supplementary Data 1). For that, we assumed that the secreted protein is globular and has a volume  $V_p$   
415 ( $\text{nm}^3$ ) that is directly proportional to its molecular weight  $MW$ <sup>54</sup>:

$$416 \quad V_p = MW \times 0.00121 \quad (1)$$

417 Finally, we assumed that only 70 percent of the vesicular volume can be occupied by the target protein.

418 Thus, the cost of vesicular transport via COPII vesicles with Volume  $V_{COPII}$  is:

$$419 \quad 192 \text{ GTPs} \div (V_{COPII} \times 0.7 \div V) \quad (2)$$

420 Similarly, the cost of vesicular secretion is:

$$421 \quad 44 \text{ GTPs} \div (V_{Secretory} \times 0.7 \div V) \quad (3)$$

422

### 423 **Constraints used in models and Pareto optimality frontiers**

424 All models were constrained using different sets of experimental uptake rates, which can be found in  
425 Supplementary Data 3. To construct Pareto optimality frontiers, we used the robustAnalysis function from  
426 the COBRA Toolbox v2.0 in Matlab 2015b using biomass as the control and secretion of the recombinant  
427 protein as the objective reactions, respectively.

428

### 429 **Analysis of gene expression versus protein cost**

430 Ribosome-profiling data<sup>12</sup> were used to quantify the ribosomal occupancy of each transcript in CHO  
431 cells. A cutoff of 1 RPKM was used to remove genes with low expression (10,045 genes removed from day  
432 3 analysis and 10,411 from day 6 analysis). We used Spearman correlation to assess the variation of  
433 expression levels with respect to protein ATP cost.

434

### 435 **CHO-DG44 model and prediction of *neoR* knock-out effect**

436 Ribosome-profiling data, specific productivity, product sequence, and growth rates of an IgG-  
437 producing CHO-DG44 cell line were obtained from a previous publication<sup>12</sup>. From the same cultures, we  
438 obtained further cell dry weight and metabolomic data from spent culture medium for this study. The  
439 mCADRE algorithm<sup>55,56</sup> was used to construct a DG44 cell line-specific iCHO2048s model. The specific  
440 productivity and the RPKM values of the secreted IgG were used to estimate the translation rate for the  
441 *neoR* selection marker gene. We assumed that the flux (in units of mmol per gram dry weight per hour)  
442 through the *neoR* translation reaction ( $v_{neoR}$ ) should be proportional to that of the IgG translation rate  
443 ( $v_{IgG}$ , calculated from the measured specific productivity) and related to their expression ratios (i.e. the  
444 RPKM values of their genes in the ribosome-profiling data).

$$445 \quad v_{neoR} = \frac{RPKM_{neoR}}{2(RPKM_{light} + RPKM_{heavy})} v_{IgG} \quad (4)$$

446 Finally, a reaction of *neoR* peptide translation (which is expressed in cytosol and is not processed in  
447 the secretory pathway) was added to construct a *neoR*-specific iCHO2048s model. Uptake and secretion  
448 rates of relevant metabolites on days 3 and 6 of cell culture were used to constrain our model. Because  
449 recombinant proteins represent 20% of total cell protein<sup>57</sup>, we scaled the coefficients of all 20 amino acids  
450 in the model's biomass reaction accordingly (i.e. each coefficient was multiplied by 0.8). We then used  
451 FBA to predict the specific productivity of IgG with or without *neoR*.

452

### 453 **Cell dry weight measurements**

454 For cell dry weight measurements, 6 tubes containing 2 mL of culture samples of known viable cell  
455 density and viability were freeze dried, weighed, washed in PBS, and weighed again. The difference in  
456 weight was used to calculate the mass per cell. The procedure resulted in an average cell dry weight of  
457 456 pg per cell. As a simplification, we assumed that cell dry weight does not significantly differ from this  
458 average measured value during culture and thus was used when computing flux distributions in all  
459 simulations.

460

### 461 **Calculation of growth and productivity rates**

462 Supplementary Data 3 contains the experimental uptake and secretion rates used to constrain the  
463 iCHO2048s models<sup>12,22,23</sup>. When rates were not explicitly stated in the studies we consulted, we used a  
464 method we developed previously<sup>27</sup>. Briefly, appropriate viable cell density, titer, and metabolite  
465 concentration plots were digitized using WebPlot Digitizer software and we computed the corresponding  
466 rates as follows:

467 Growth rate (in units of inverse hours):

$$468 \quad \mu = \frac{1}{VCD} \frac{d}{dt} VCD \quad (5)$$

469 Where VCD is the viable cell density (in units of cells per milliliter)

470 Specific productivity (in units of picograms per cell per hour):

$$471 \quad q_p = \frac{1}{VCD} \frac{d}{dt} Titer \quad (6)$$

472 Consumption or production rate  $v_x$  of metabolite  $x$  (in units of millimoles per gram dry weight per hour):

$$473 \quad v_x = \frac{1}{VCD} \frac{d[x]}{dt} \quad (7)$$

474

## 475 **Data Availability**

476 All data that support the findings of this study, including the models, tables, and Jupyter Notebooks,  
477 are available at <https://github.com/LewisLabUCSD/MammalianSecretaryRecon> as well as in the  
478 Supplementary Data and Source Data files. The Ribo-seq and RNA-seq data from the study by Kallehauge  
479 et al.<sup>12</sup> is available on the Gene Expression Omnibus with GEO Accession Number GSE79512  
480 (<https://www.ncbi.nlm.nih.gov/geo/query/acc.cgi?acc=GSE79512>). The RNA sequencing data for human  
481 tissue is freely available at the Human Protein Atlas website  
482 (<https://www.proteinatlas.org/about/download>).

483

## 484 **Code Availability**

485 All code used to generate the results of this study, including Jupyter Notebooks, MATLAB, and Python  
486 scripts, are freely accessible at <https://github.com/LewisLabUCSD/MammalianSecretaryRecon>

487

## 488 **Acknowledgements**

489 The authors would like to thank Philipp Spahn, Austin Chiang, and Chih-Chung Kuo for their insightful  
490 comments on this manuscript. This work was supported by generous funding from the Novo Nordisk  
491 Foundation provided to the Center for Biosustainability at the Technical University of Denmark  
492 (NNF10CC1016517 and NNF16CC0021858), and from NIGMS (R35 GM119850), and a fellowship from the  
493 Government of Mexico (CONACYT) and the University of California Institute for Mexico and the United  
494 States (UC-MEXUS).

495

## 496 **Author Contributions**

497 J.M.G., A.F., and N.E.L. conceived the project and designed the experiments. J.M.G., A.F., S.L., T.B.K,  
498 H.H., L.G., D.L collected data. J.M.G. and D.B.H. performed experiments. J.M.G. performed research,  
499 analyzed the data and interpreted the results. J.M.G., A.F. and N.E.L. drafted the article. M.J.B., B.V.,  
500 H.F.K., G.M.L., B.O.P, J.N., and N.E.L. critically revised and approved the article.

501

## 502 **Competing Interests**

503 The authors declare no competing interests.

504

505



## 506 References

- 507 1. Uhlén, M. *et al.* Tissue-based map of the human proteome. *Science* **347**, (2015).
- 508 2. Walsh, G. Biopharmaceutical benchmarks 2018. *Nat. Biotechnol.* **36**, 1136–1145 (2018).
- 509 3. Feizi, A., Österlund, T., Petranovic, D., Bordel, S. & Nielsen, J. Genome-Scale Modeling of the  
510 Protein Secretory Machinery in Yeast. *PLoS One* **8**, e63284 (2013).
- 511 4. Liu, L., Feizi, A., Österlund, T., Hjort, C. & Nielsen, J. Genome-scale analysis of the high-efficient  
512 protein secretion system of *Aspergillus oryzae*. *BMC Syst. Biol.* **8**, 73 (2014).
- 513 5. Irani, Z. A., Kerkhoven, E. J., Shojaosadati, S. A. & Nielsen, J. Genome-scale metabolic model of  
514 *Pichia pastoris* with native and humanized glycosylation of recombinant proteins. *Biotechnol.*  
515 *Bioeng.* **113**, 961–969 (2016).
- 516 6. Lund, A. M. *et al.* Network reconstruction of the mouse secretory pathway applied on CHO cell  
517 transcriptome data. *BMC Syst. Biol.* **11**, 37 (2017).
- 518 7. Hiller, K., Grote, A., Scheer, M., Munch, R. & Jahn, D. PrediSi: prediction of signal peptides and  
519 their cleavage positions. *Nucleic Acids Res.* **32**, W375–W379 (2004).
- 520 8. Fankhauser, N. & Maser, P. Identification of GPI anchor attachment signals by a Kohonen self-  
521 organizing map. *Bioinformatics* **21**, 1846–1852 (2005).
- 522 9. Yang, Z. *et al.* The GalNAc-type O-Glycoproteome of CHO cells characterized by the SimpleCell  
523 strategy. *Mol. Cell. Proteomics* **13**, 3224–35 (2014).
- 524 10. Kaufman, R. J. *et al.* Effect of von Willebrand Factor Coexpression on the Synthesis and Secretion  
525 of Factor VIII in Chinese Hamster Ovary Cells. *Mol. Cell. Biol.* **9**, 1233–1242 (1989).
- 526 11. Pipe, S. W., Morris, J. A., Shah, J. & Kaufman, R. J. Differential interaction of coagulation factor  
527 VIII and factor V with protein chaperones calnexin and calreticulin. *J. Biol. Chem.* **273**, 8537–44  
528 (1998).
- 529 12. Kallehauge, T. B. *et al.* Ribosome profiling-guided depletion of an mRNA increases cell growth  
530 rate and protein secretion. *Sci. Rep.* **7**, 40388 (2017).
- 531 13. van Wijk, X. M. *et al.* Whole-Genome Sequencing of Invasion-Resistant Cells Identifies Laminin  $\alpha$ 2  
532 as a Host Factor for Bacterial Invasion. *MBio* **8**, e02128-16 (2017).
- 533 14. Feizi, A., Gatto, F., Uhlen, M. & Nielsen, J. Human protein secretory pathway genes are expressed  
534 in a tissue-specific pattern to match processing demands of the secretome. *npj Syst. Biol. Appl.* **3**,  
535 22 (2017).
- 536 15. Swainston, N. *et al.* Recon 2.2: from reconstruction to model of human metabolism.  
537 *Metabolomics* **12**, 109 (2016).

- 538 16. Sigurdsson, M. I., Jamshidi, N., Steingrímsson, E., Thiele, I. & Palsson, B. O. A detailed genome-  
539 wide reconstruction of mouse metabolism based on human Recon 1. *BMC Syst. Biol.* **4**, 140  
540 (2010).
- 541 17. Hefzi, H. *et al.* A Consensus Genome-scale Reconstruction of Chinese Hamster Ovary Cell  
542 Metabolism. *Cell Syst.* **3**, 434–443.e8 (2016).
- 543 18. Templeton, N., Dean, J., Reddy, P. & Young, J. D. Peak Antibody Production is Associated With  
544 Increased Oxidative Metabolism in an Industrially Relevant Fed-Batch CHO Cell Culture.  
545 *Biotechnol. Bioeng* **110**, 2013–2024 (2013).
- 546 19. Kim, S. J., Kim, N. S., Ryu, C. J., Hong, H. J. & Lee, G. M. Characterization of chimeric antibody  
547 producing CHO cells in the course of dihydrofolate reductase-mediated gene amplification and  
548 their stability in the absence of selective pressure. *Biotechnol. Bioeng.* **58**, 73–84 (1998).
- 549 20. Kol, S. *et al.* Multiplex secretome engineering enhances recombinant protein production and  
550 purity. Preprint at <https://www.biorxiv.org/content/10.1101/647214v1> (2019).
- 551 21. Gu, M. B., Todd, P. & Kompala, D. S. Metabolic burden in recombinant CHO cells: effect of dhfr  
552 gene amplification and lacZ expression. *Cytotechnology* **18**, 159–166 (1996).
- 553 22. Gu, M. B., Todd, P. & Kompala, D. S. Analysis of foreign protein overproduction in recombinant  
554 CHO cells. Effect of growth kinetics and cell cycle traverse. *Ann. N. Y. Acad. Sci.* **721**, 194–207  
555 (1994).
- 556 23. Hansen, H. G., Pristovšek, N., Kildegaard, H. F. & Lee, G. M. Improving the secretory capacity of  
557 Chinese hamster ovary cells by ectopic expression of effector genes: Lessons learned and future  
558 directions. *Biotechnol. Adv.* **35**, 64–76 (2017).
- 559 24. Delic, M., Göngrich, R., Mattanovich, D. & Gasser, B. Engineering of Protein Folding and  
560 Secretion—Strategies to Overcome Bottlenecks for Efficient Production of Recombinant Proteins.  
561 *Antioxid. Redox Signal.* **21**, 414–437 (2014).
- 562 25. Le Fourn, V., Girod, P.-A., Buceta, M., Regamey, A. & Mermod, N. CHO cell engineering to prevent  
563 polypeptide aggregation and improve therapeutic protein secretion. *Metab. Eng.* **21**, 91–102  
564 (2014).
- 565 26. Kuo, C. C. *et al.* The emerging role of systems biology for engineering protein production in CHO  
566 cells. *Curr. Opin. Biotechnol.* **51**, 64–69 (2018).
- 567 27. Golabgir, A. *et al.* Quantitative feature extraction from the Chinese hamster ovary bioprocess  
568 bibliome using a novel meta-analysis workflow. *Biotechnol. Adv.* **34**, 621–633 (2016).
- 569 28. Borth, N., Mattanovich, D., Kunert, R. & Kättinger, H. Effect of Increased Expression of Protein

- 570 Disulfide Isomerase and Heavy Chain Binding Protein on Antibody Secretion in a Recombinant  
571 CHO Cell Line. *Biotechnol. Prog.* **21**, 106–111 (2008).
- 572 29. Ku, S. C. Y., Ng, D. T. W., Yap, M. G. S. & Chao, S.-H. Effects of overexpression of X-box binding  
573 protein 1 on recombinant protein production in Chinese hamster ovary and NS0 myeloma cells.  
574 *Biotechnol. Bioeng.* **99**, 155–164 (2008).
- 575 30. Yusufi, F. N. K. *et al.* Mammalian Systems Biotechnology Reveals Global Cellular Adaptations in a  
576 Recombinant CHO Cell Line. *Cell Syst.* **4**, 530–542.e6 (2017).
- 577 31. Selvarasu, S. *et al.* Combined in silico modeling and metabolomics analysis to characterize fed-  
578 batch CHO cell culture. *Biotechnol. Bioeng.* **109**, 1415–1429 (2012).
- 579 32. Gutierrez, J. M. & Lewis, N. E. Optimizing eukaryotic cell hosts for protein production through  
580 systems biotechnology and genome-scale modeling. *Biotechnol. J.* **10**, 939–49 (2015).
- 581 33. Quek, L.-E. *et al.* Reducing Recon 2 for steady-state flux analysis of HEK cell culture. *J. Biotechnol.*  
582 **184**, 172–178 (2014).
- 583 34. Selvarasu, S., Karimi, I. A., Ghim, G.-H. & Lee, D.-Y. Genome-scale modeling and in silico analysis  
584 of mouse cell metabolic network. *Mol. BioSyst.* **6**, 152–161 (2009).
- 585 35. Sheikh, K., Förster, J. & Nielsen, L. K. Modeling Hybridoma Cell Metabolism Using a Generic  
586 Genome-Scale Metabolic Model of *Mus musculus*. *Biotechnol. Prog.* **21**, 112–121 (2008).
- 587 36. Galleguillos, S. N. *et al.* What can mathematical modelling say about CHO metabolism and  
588 protein glycosylation? *Comput. Struct. Biotechnol. J.* **15**, 212–221 (2017).
- 589 37. Araki, K. & Inaba, K. Structure, mechanism, and evolution of Ero1 family enzymes. *Antioxid.*  
590 *Redox Signal.* **16**, 790–9 (2012).
- 591 38. Jimenez Del Val, I., Polizzi, K. M. & Kontoravdi, C. A theoretical estimate for nucleotide sugar  
592 demand towards Chinese Hamster Ovary cellular glycosylation. *Sci. Rep.* **6**, (2016).
- 593 39. O’Brien, E. J., Lerman, J. A., Chang, R. L., Hyduke, D. R. & Palsson, B. O. Genome-scale models of  
594 metabolism and gene expression extend and refine growth phenotype prediction. *Mol. Syst. Biol.*  
595 **9**, 693–693 (2014).
- 596 40. Vazquez, A. & Oltvai, Z. N. Macromolecular crowding explains overflow metabolism in cells. *Sci.*  
597 *Rep.* **6**, (2016).
- 598 41. Beg, Q. K. *et al.* Intracellular crowding defines the mode and sequence of substrate uptake by  
599 *Escherichia coli* and constrains its metabolic activity. *Proc. Natl. Acad. Sci. U. S. A.* **104**, 12663–8  
600 (2007).
- 601 42. Spahn, P. N. & Lewis, N. E. Systems glycobiology for glycoengineering. *Curr. Opin. Biotechnol.*

- 602           **30C**, 218–224 (2014).
- 603   43.   Tejwani, V., Andersen, M. R., Nam, J. H. & Sharfstein, S. T. Glycoengineering in CHO Cells:  
604       Advances in Systems Biology. *Biotechnol. J.* **13**, 1700234 (2018).
- 605   44.   Spahn, P. N. *et al.* A Markov chain model for N-linked protein glycosylation - towards a low-  
606       parameter tool for model-driven glycoengineering. *Metab. Eng.* **33**, 52–66 (2016).
- 607   45.   Lewis, N. E., Nagarajan, H. & Palsson, B. O. Constraining the metabolic genotype-phenotype  
608       relationship using a phylogeny of in silico methods. *Nat. Rev. Microbiol.* **10**, 291–305 (2012).
- 609   46.   Araki, K. & Nagata, K. Protein Folding and Quality Control in the ER. *Cold Spring Harb. Perspect.*  
610       *Biol.* **3**, a007526–a007526 (2011).
- 611   47.   Baycin-Hizal, D. *et al.* Proteomic Analysis of Chinese Hamster Ovary Cells. *J. Proteome Res.* **11**,  
612       5265–5276 (2012).
- 613   48.   Orth, J. D., Thiele, I. & Palsson, B. Ø. What is flux balance analysis? *Nat. Biotechnol.* **28**, 245–8  
614       (2010).
- 615   49.   Schellenberger, J. *et al.* Quantitative prediction of cellular metabolism with constraint-based  
616       models: the COBRA Toolbox v2.0. *Nat. Protoc.* **6**, 1290–1307 (2011).
- 617   50.   Grainger, R. K. & James, D. C. CHO cell line specific prediction and control of recombinant  
618       monoclonal antibody N-glycosylation. *Biotechnol. Bioeng.* **110**, 2970–2983 (2013).
- 619   51.   Borner, G. H. H. *et al.* Multivariate proteomic profiling identifies novel accessory proteins of  
620       coated vesicles. *J. Cell Biol.* **197**, 141–160 (2012).
- 621   52.   Cheng, Y., Boll, W., Kirchhausen, T., Harrison, S. C. & Walz, T. Cryo-electron Tomography of  
622       Clathrin-coated Vesicles: Structural Implications for Coat Assembly. *J. Mol. Biol.* **365**, 892–899  
623       (2007).
- 624   53.   Takamori, S. *et al.* Molecular Anatomy of a Trafficking Organelle. *Cell* **127**, 831–846 (2006).
- 625   54.   Liu, J. K. *et al.* Reconstruction and modeling protein translocation and compartmentalization in  
626       Escherichia coli at the genome-scale. *BMC Syst. Biol.* **8**, 110 (2014).
- 627   55.   Opdam, S. *et al.* A Systematic Evaluation of Methods for Tailoring Genome-Scale Metabolic  
628       Models. *Cell Syst.* **4**, 318–329.e6 (2017).
- 629   56.   Wang, Y., Eddy, J. A. & Price, N. D. Reconstruction of genome-scale metabolic models for 126  
630       human tissues using mCADRE. *BMC Syst. Biol.* **6**, 153 (2012).
- 631   57.   González-Leal, I. J. *et al.* Use of a Plackett-Burman statistical design to determine the effect of  
632       selected amino acids on monoclonal antibody production in CHO cells. *Biotechnol. Prog.* **27**,  
633       1709–1717 (2011).

- 634 58. Uhlen, M. *et al.* The human secretome - the proteins secreted from human cells. Preprint at  
635 <https://www.biorxiv.org/content/10.1101/465815v2> (2018).
- 636 59. Martínez, V. S., Buchsteiner, M., Gray, P., Nielsen, L. K. & Quek, L.-E. Dynamic metabolic flux  
637 analysis using B-splines to study the effects of temperature shift on CHO cell metabolism. *Metab.*  
638 *Eng. Commun.* **2**, 46–57 (2015).

639 **FIGURE LEGENDS**

640

641 **Figure 1 – Mammalian secretory cells preferentially suppress more expensive proteins.** The bioenergetic  
642 cost of each secreted CHO (a) and human (c) protein was computed. The bioenergetic costs of five  
643 representative biotherapeutics produced in CHO cells are shown for comparison purposes (see Table 1).  
644 (b) Scatter plot and Spearman correlation of gene expression measured by ribosomal profiling and protein  
645 cost (in number of ATP per protein) in CHO cells from Kallehauge et al.<sup>12</sup> during the early exponential  
646 growth phase of culture. (d) Spearman correlations between ATP cost and gene expression levels  
647 (measured by RNA-seq) across human tissues<sup>1, 58</sup>. Gene transcription levels from the Human Protein Atlas  
648 were analyzed against the ATP cost of producing the translated proteins. All p-values associated to each  
649 correlation are  $<1 \times 10^{-20}$ . Highly secretory tissues show the strongest negative correlation of secreted  
650 protein cost vs. mRNA expression levels. RPKM = reads per kilobase of transcript per million. Source data  
651 are provided as a Source Data file.

652

653 **Figure 2 - Components in the reconstruction of the secretory pathway in mammalian cells.** (a) The  
654 reconstruction comprises 261 proteins in CHO cells and 271 proteins in human and mouse that are  
655 distributed across 12 subsystems. The different component numbers arise from the fact that the Chinese  
656 hamster proteome annotation only contains one alpha and one beta proteasome subunits, whereas the  
657 human and mouse contain 12 subunits of different subtypes. (b) High similarities were seen for proteins  
658 in CHO and human, with a high mean percentage identity in each subsystem (calculated with the sequence  
659 alignment tool BLAST). (c) Simplified schematic of reactions and subsystems involved in the secretion of a  
660 monoclonal antibody (mAb). A total of eight subsystems are necessary to translate, fold, transport,  
661 glycosylate, and secrete a mAb. The color of the subsystem names indicates if the reactions occur in the  
662 cytoplasm (orange), the ER lumen (red) or the Golgi apparatus (blue). The detailed description of all  
663 components can be found in Supplementary Data 1. GPI = Glycosylphosphatidylinositol, ER = Endoplasmic  
664 Reticulum, ERAD = ER associated degradation.

665

666 **Figure 3 – Recombinant-protein-producing models of iCHO2048s predict measured growth rates.** (a)  
667 Growth rates were computed using an IgG-specific iCHO2048s model and compared to experimentally  
668 measured growth rates from six datasets from two previous studies using IgG-producing cell lines<sup>12,18</sup>. NT  
669 and TK specify the initials of the first author of the two studies (Neil Templeton, Thomas Kallehauge). (b)  
670 Additional growth, productivity, and metabolomic data were obtained from Enbrel and C1INH-producing

671 CHO cells, and models were constructed. The model-predicted growth rates during exponential growth  
672 phase were consistent with experimental growth rates of Enbrel-producing CHO cells and C11NH-  
673 producing CHO cells at almost all time points. In all cases, the iCHO2048s models were constrained to  
674 produce the recombinant protein at the measured specific productivity rate. The values used to constrain  
675 each of the iCHO2048s models are reported in Supplementary Data 3. Error bars represent the standard  
676 deviation of three biological replicates. Source data are provided as a Source Data file.

677  
678 **Figure 4 - Construction of product-specific iCHO2048s models.** (a) Eight product-specific iCHO2048s  
679 models were constructed for biotherapeutics commonly produced in CHO cells. (b) Pareto optimality  
680 frontiers of growth-productivity trade-off curves were computed for the eight iCHO2048s models using  
681 the same constraints and experimental data from Supplementary Data 3. The shaded region corresponds  
682 to range of maximum productivity at commonly observed growth rates in CHO cell cultures. The molecular  
683 weight (in Daltons) of each biotherapeutic is shown in the legend. (c) All protein features (PTMs,  
684 transmembrane domains, and amino acid compositions) were used to fit a multivariate linear regression  
685 to predict specific productivity. The model coefficients ( $\beta$ ) quantify their contribution to the explained  
686 variation in specific productivity. Error bars represent the standard error of the fitted coefficients. Source  
687 data are provided as a Source Data file.

688  
689 **Figure 5 - iCHO2048s recapitulates experimental results of *neoR* knock-down in silico.** (a) Ribosome  
690 occupancy was measured with ribosomal profiling during early (left) and late (right) exponential growth  
691 phases<sup>12</sup>. (b) Time profiles are shown for viable cell density (VCD) and titer in experimental culture. Shaded  
692 boxes indicate the time points corresponding to early (day 3) and late (day 6) growth phases. (c) Flux  
693 balance analysis was used to predict specific productivity ( $q_p$ ) with the iCHO2048s model before and after  
694 in silico knockout of *neoR* gene. (d) Growth-productivity trade-offs were predicted by iCHO2048s and  
695 demonstrated a potential 18% increase after the *neoR* in silico knockout. The formula for calculating the  
696 trade-off improvement ( $\Delta$ ) is shown in the plot.  $L_{WT}$  = length of trade-off curve before knockout,  $L_{KO}$  =  
697 length of trade-off curve after knockout. (e) Ribosomal occupancy for all mRNA sequences bearing a signal  
698 peptide sequence were analyzed from the Kallehauge et al.<sup>12</sup> study and demonstrated that the top 30  
699 secreted proteins accounted >50% of the ribosomal occupancy of secreted proteins. Error bars represent  
700 the standard deviation of three biological replicates. Source data are provided as a Source Data file.

701  
702

703 TABLES

704

705 Table 1. Protein specific information matrix of biotherapeutics secreted in eight iCHO2048s models

| Protein Name | Length [AA] | Weight [Da] | Disulfide bonds | N-glycans | O-glycans | ATP cost |
|--------------|-------------|-------------|-----------------|-----------|-----------|----------|
| IFNB1        | 187         | 22294       | 1               | 1         | 0         | 777      |
| EPO          | 193         | 21037       | 2               | 3         | 1         | 801      |
| BMP2         | 396         | 44702       | 4               | 5         | 0         | 1618     |
| BMP7         | 431         | 49313       | 4               | 4         | 0         | 1759     |
| tPA          | 562         | 61917       | 17              | 3         | 1         | 2286     |
| Etanercept*  | 934         | 102470      | 7               | 6         | 26        | 3784     |
| Rituximab**  | 1328        | 143860      | 17              | 2         | 0         | 5370     |
| F8           | 2351        | 267009      | 8               | 22        | 0         | 9488     |

\* = *Etanercept is a dimer*

\*\*= *Rituximab is a tetramer (2 light and 2 heavy chains)*

706

707

708 Table 2 - Experimental data used for validation of iCHO2048s predictive capabilities

| Measurement [Units]                                       | Early growth phase | Late growth phase |
|-----------------------------------------------------------|--------------------|-------------------|
| Growth Rate [1 per day]                                   | 0.44               | 0.02              |
| Specific Productivity [Picograms of IgG per cell perday]* | 16                 | 5.5               |
| Total IgG ribosomal footprint [RPKM]**                    | 40258              | 13356             |
| Total neoR ribosomal footprint [RPKM]                     | 36952              | 25679             |

\* Average cell dry weight = 456.3 pg per cell

\*\* Sum of light and heavy chains ribosomal footprints

709

710



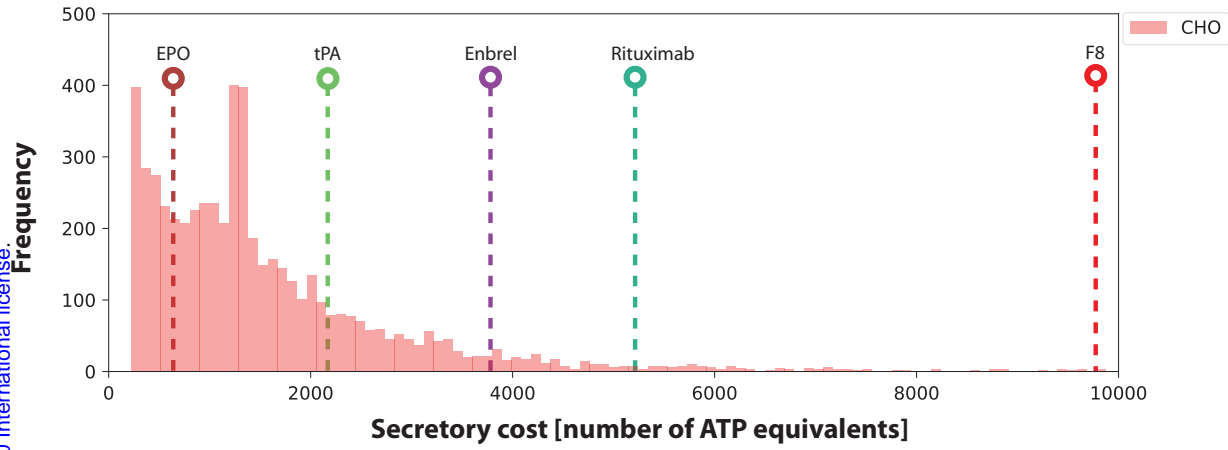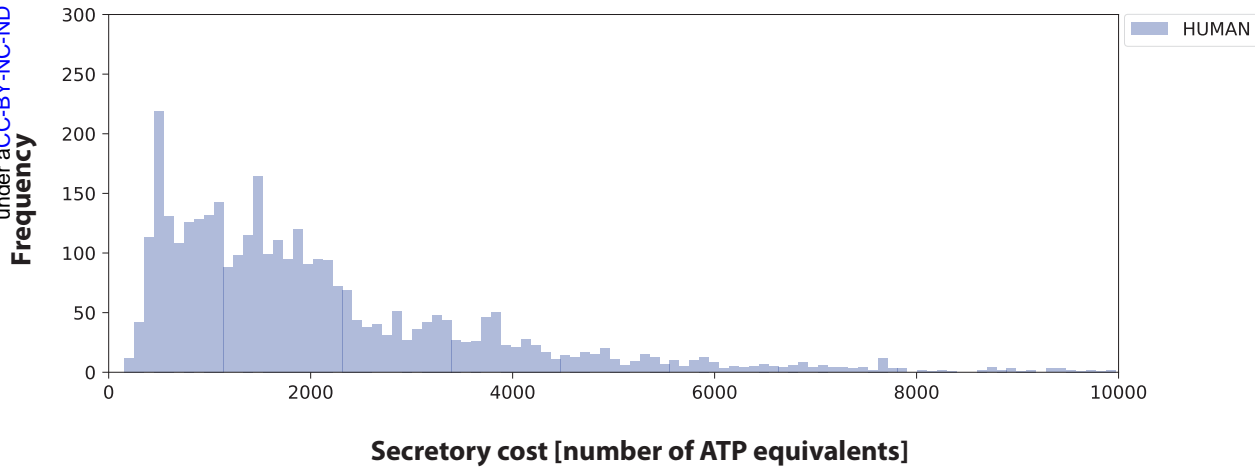

**b**

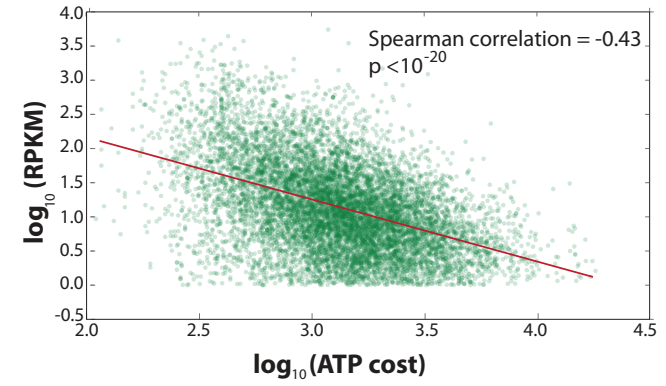

**d**

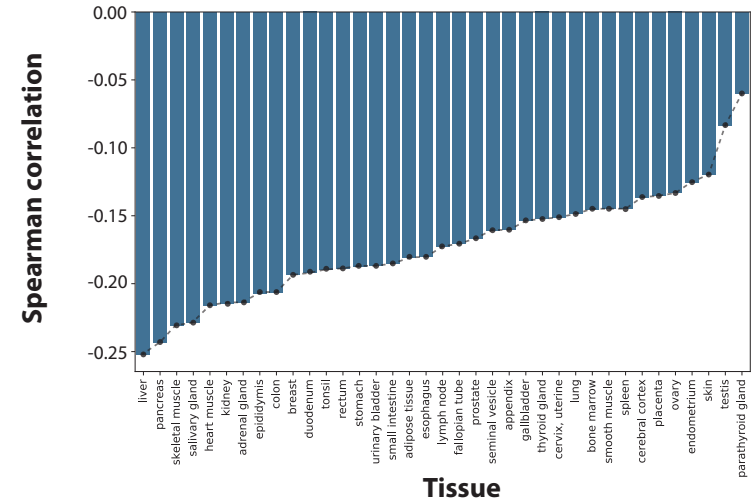

**a**

**Subsystems in secretory reconstruction**

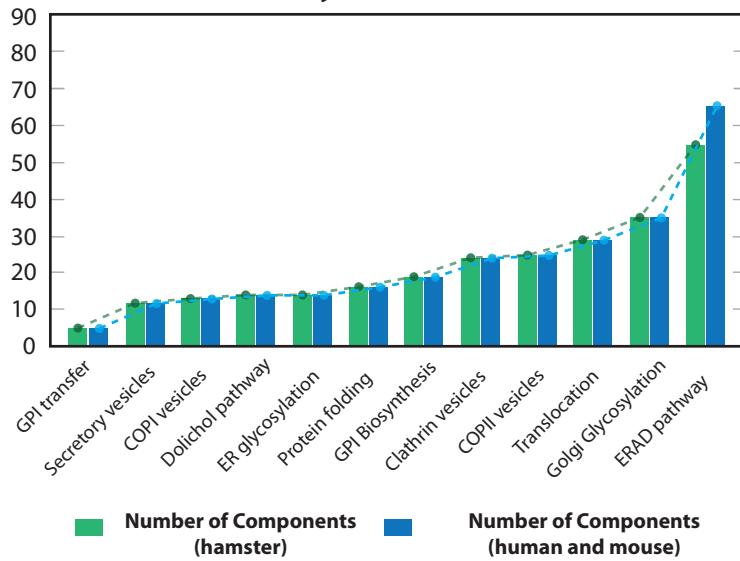

**b**

**Subsystem mean percentage identity to human ortholog**

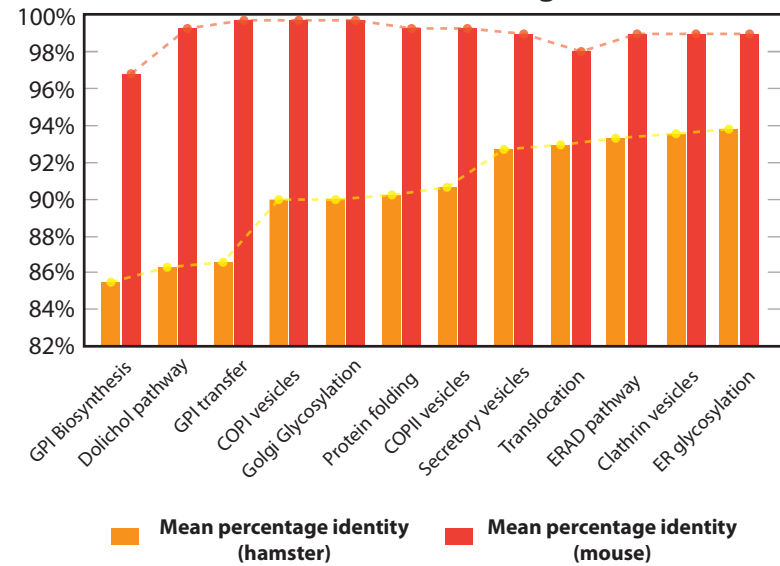

**c**

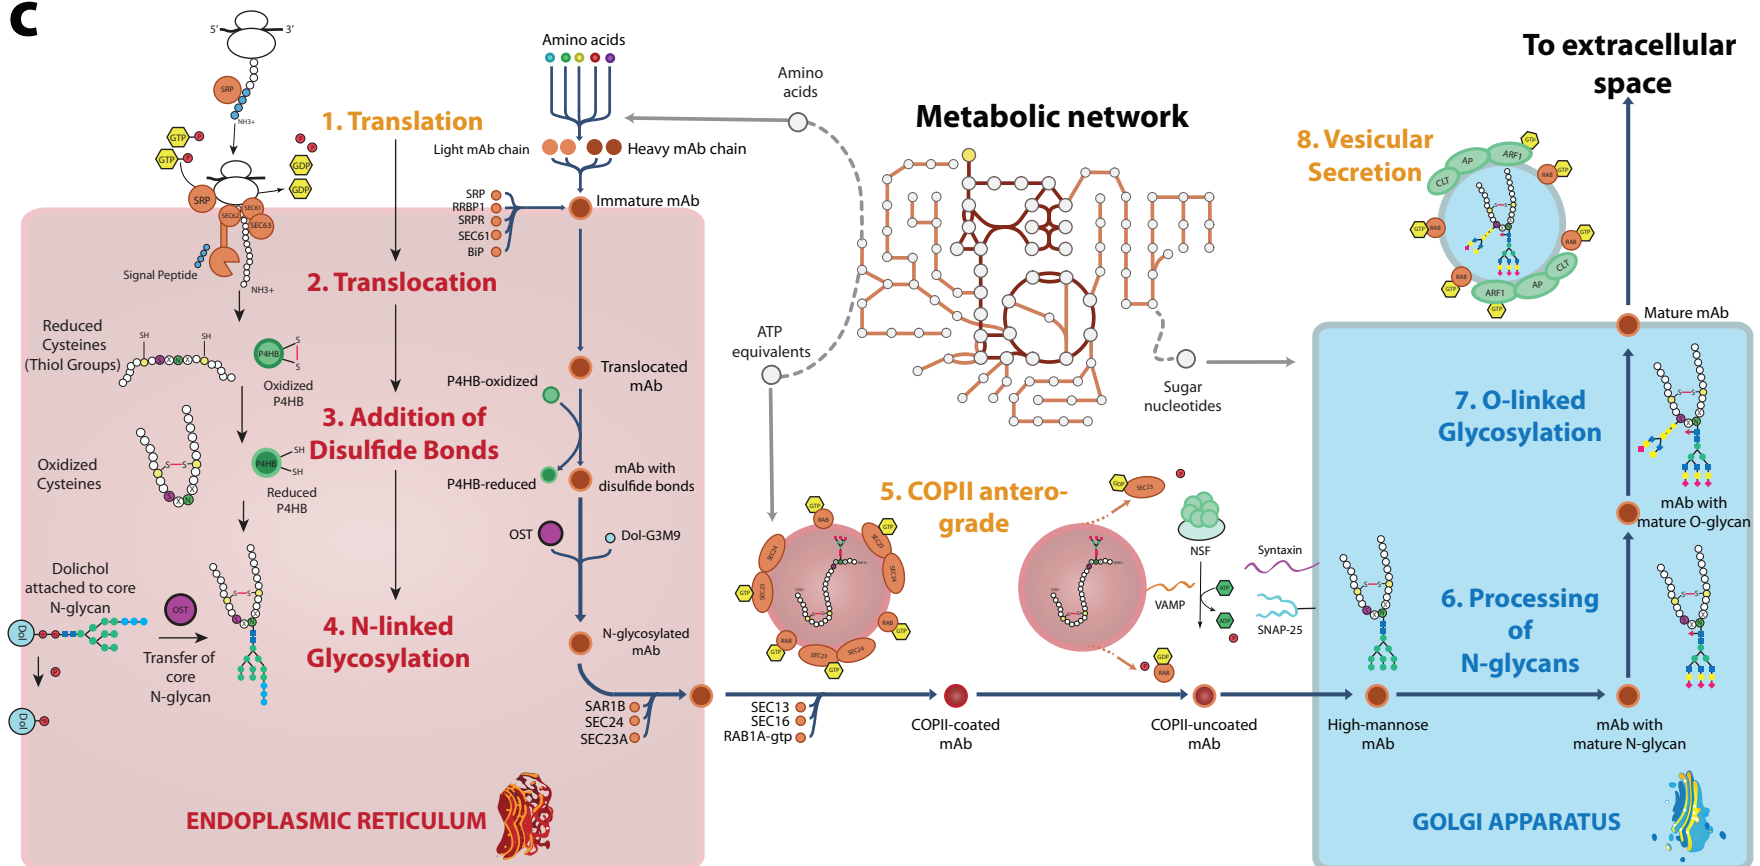

**a**

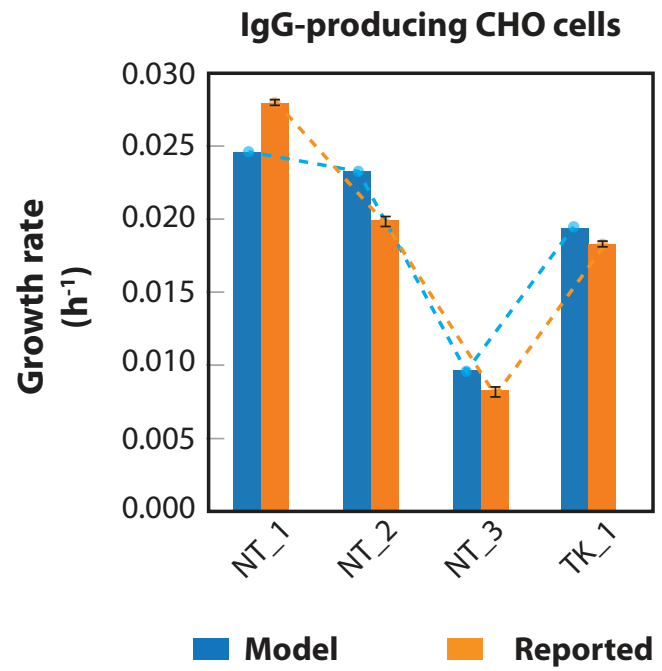

**b**

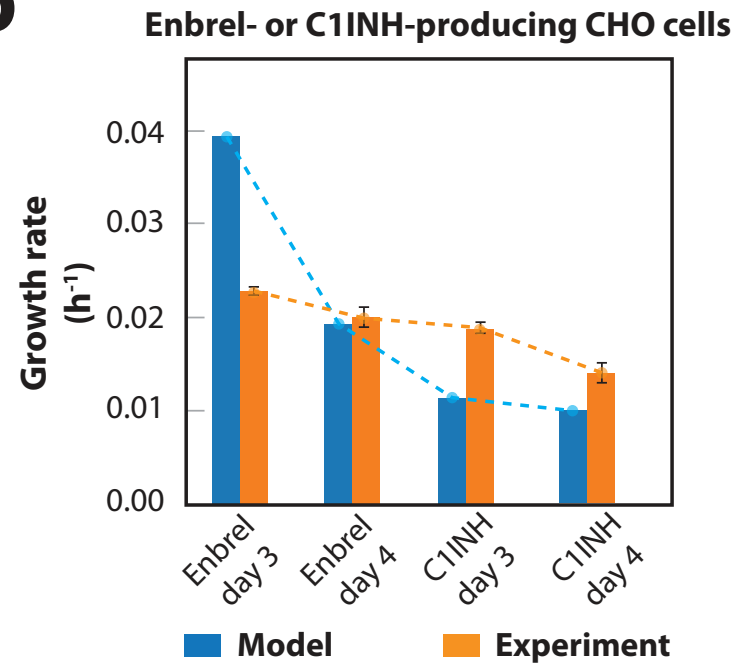

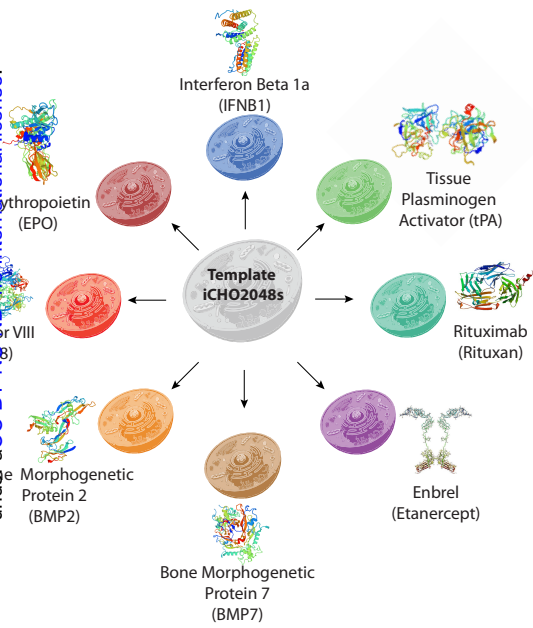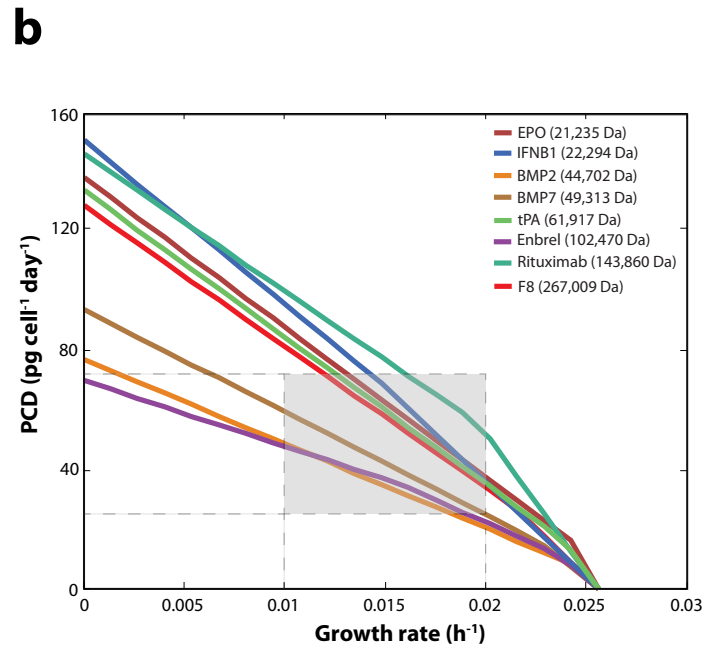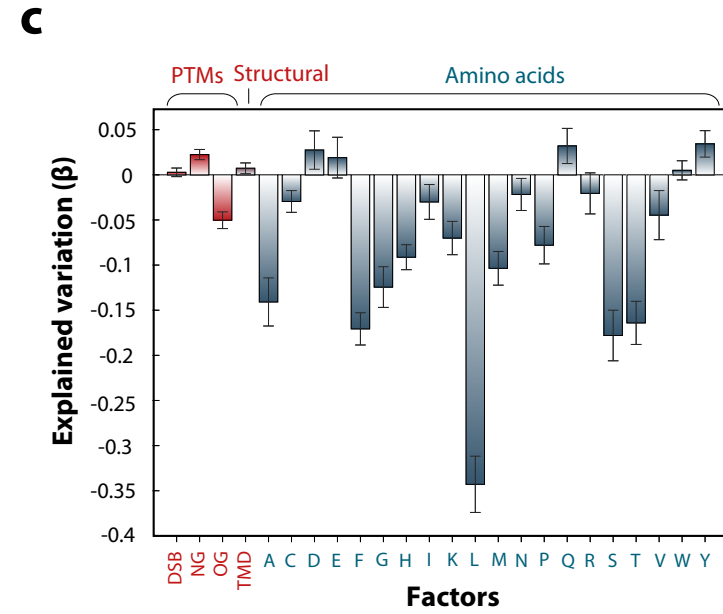

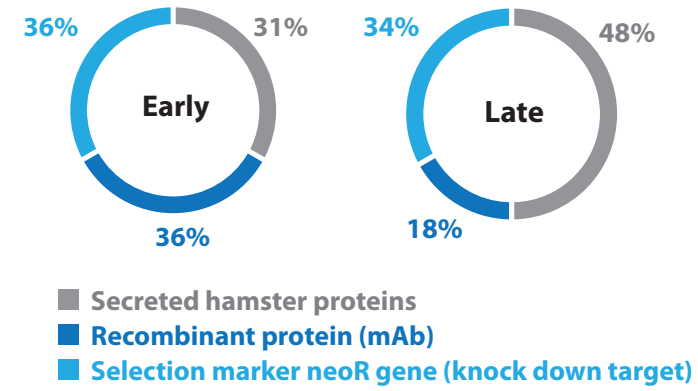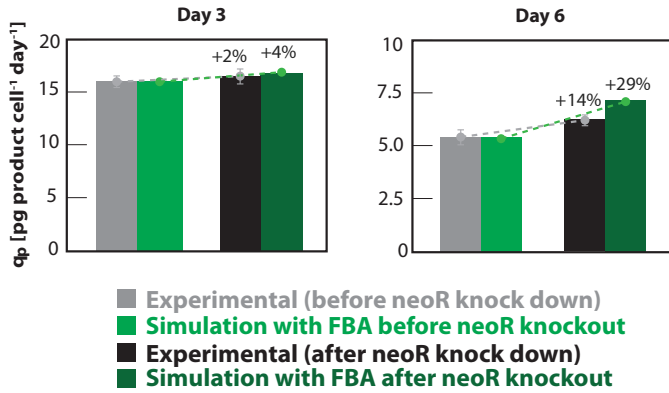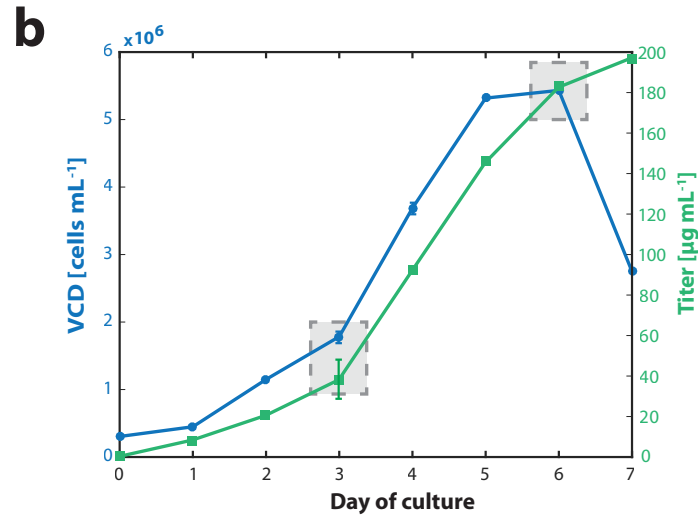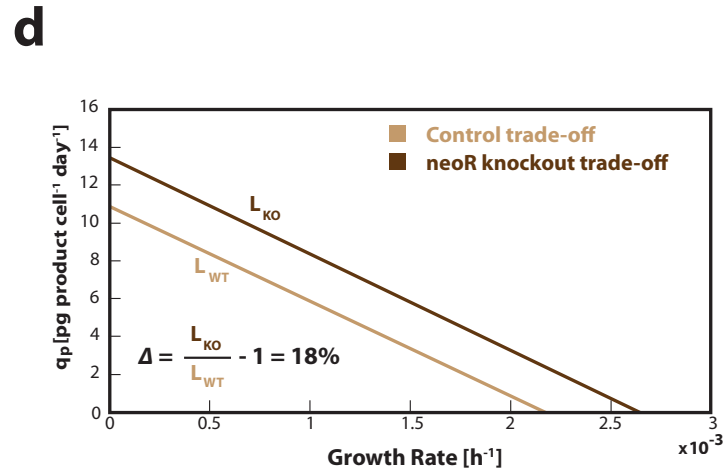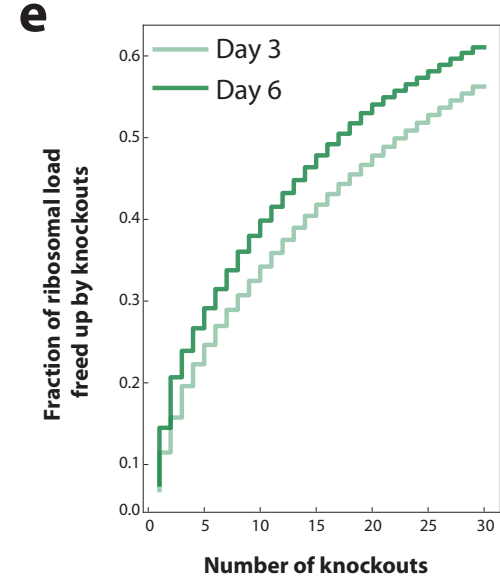

## *Supplementary Information for*

# **“Genome-scale reconstructions of the mammalian secretory pathway predict metabolic costs and limitations of protein secretion”**

*Gutierrez et al.*

### **Contents**

- Supplementary Figure 1
- Supplementary Figure 2
- Supplementary Figure 3
- Supplementary Discussion

**a****Media as defined in Kallehauge dataset**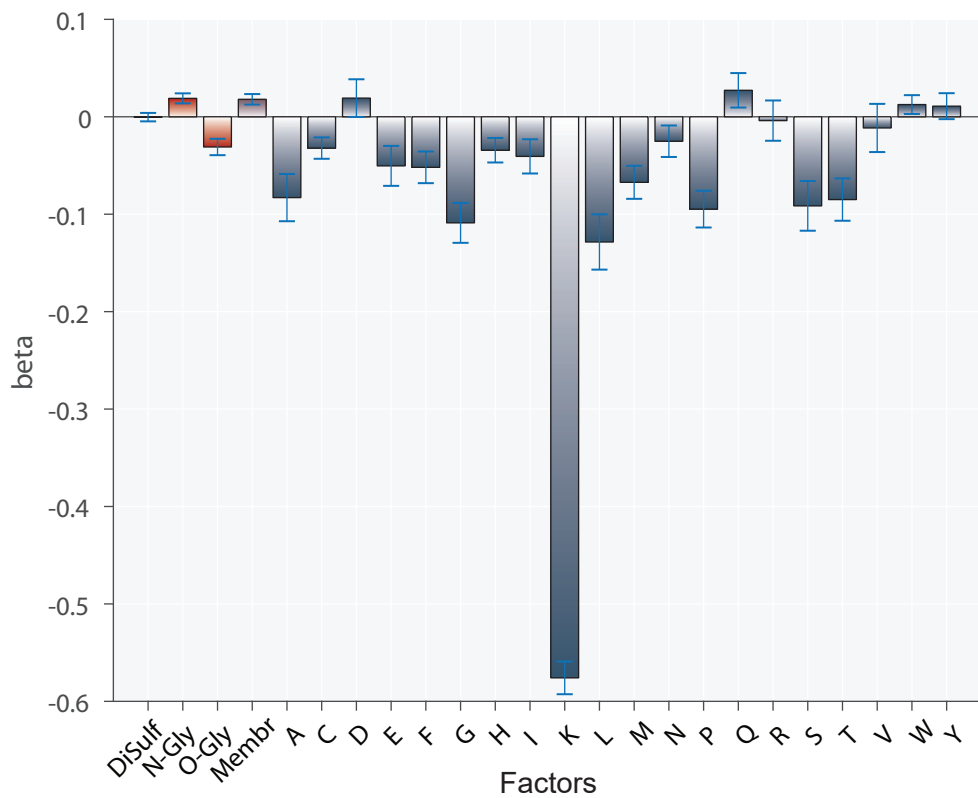**b****Media as defined in the Martinez dataset**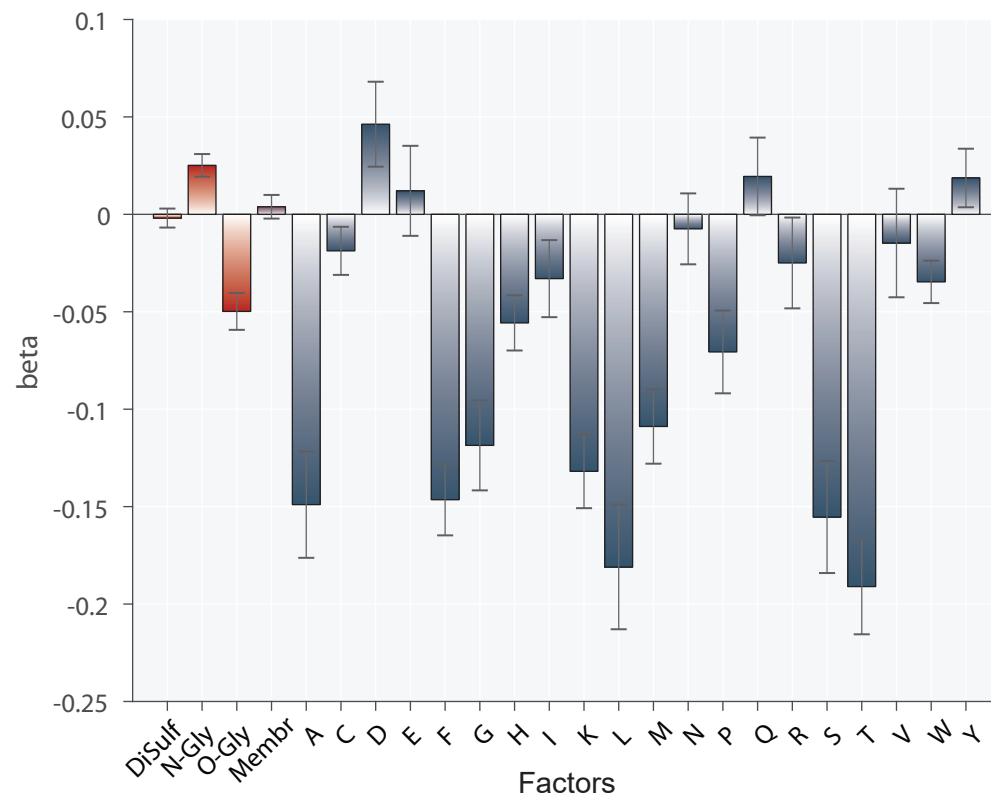

**Supplementary Figure 1 – Factors affecting iCHO2048s-predicted productivity with two different media compositions.** Linear regression coefficients ( $\beta$ ) to quantify the contribution of PTMs to the explained variation in specific productivity using uptake rates different from those used in Figure 4c. The specific consumption rates are listed in Supplementary Table 3 as Kallehauge<sup>12</sup> (left panel) and Martinez<sup>59</sup> (right panel). Error bars represent the standard error of the fitted coefficients. Source data are provided as a Source Data file.

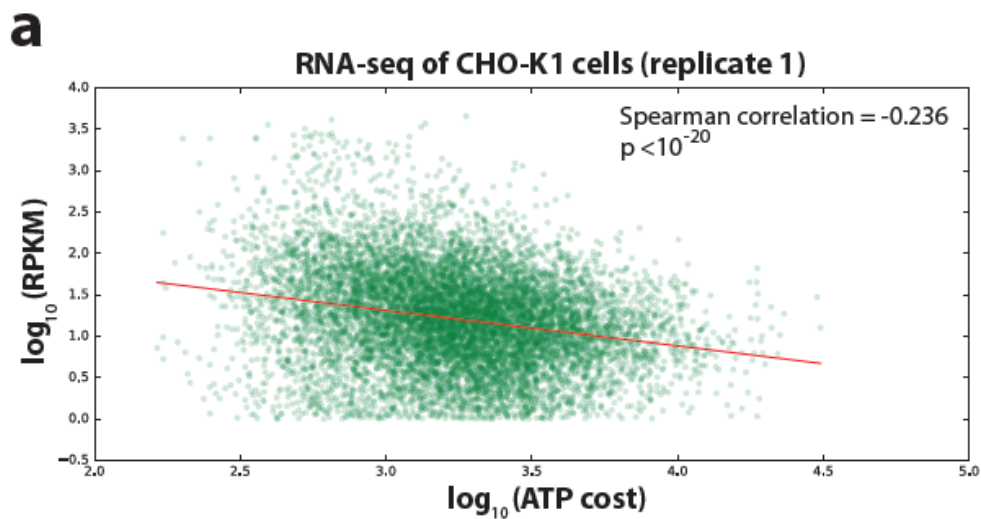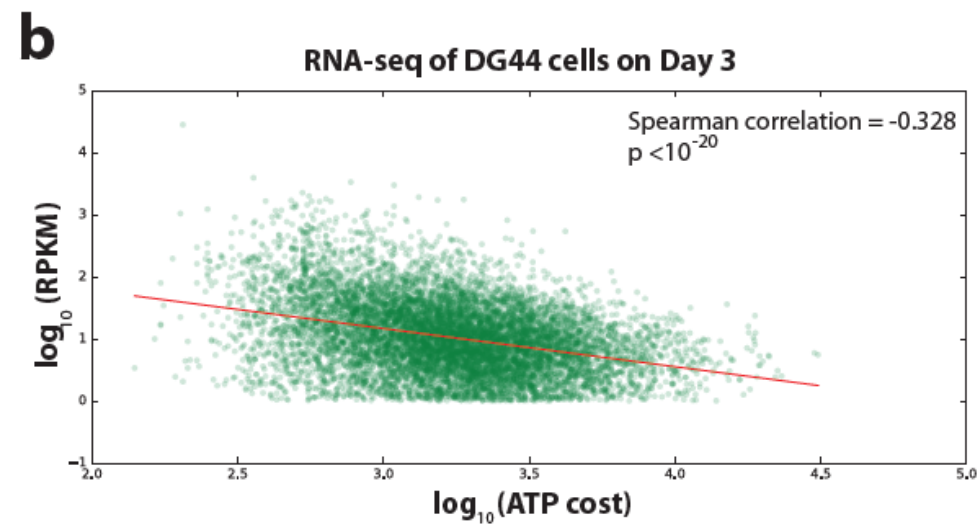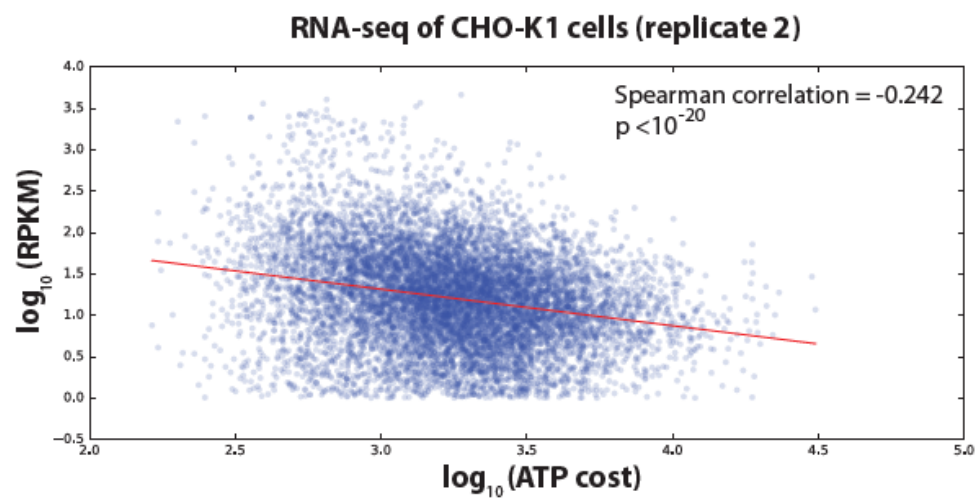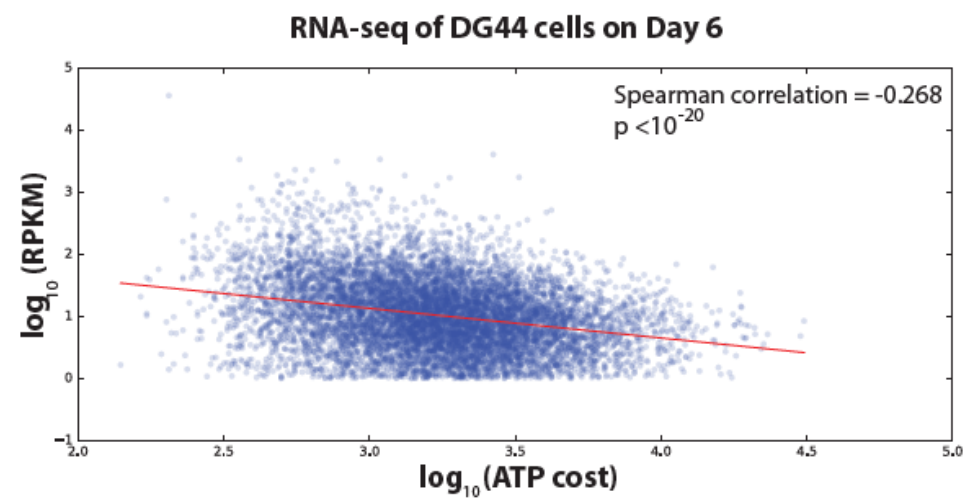

**Supplementary Figure 2 – Spearman correlation between ATP cost and gene expression levels in non-producing CHO-K1 and CHO-DG44 mAb-producing cells.** Gene transcription levels from (a) van Wijk et al.<sup>13</sup> and (b) Kallehaug et al.<sup>12</sup> were compared against the ATP cost of producing the translated proteins. Source data are available as a Source Data file.



**a**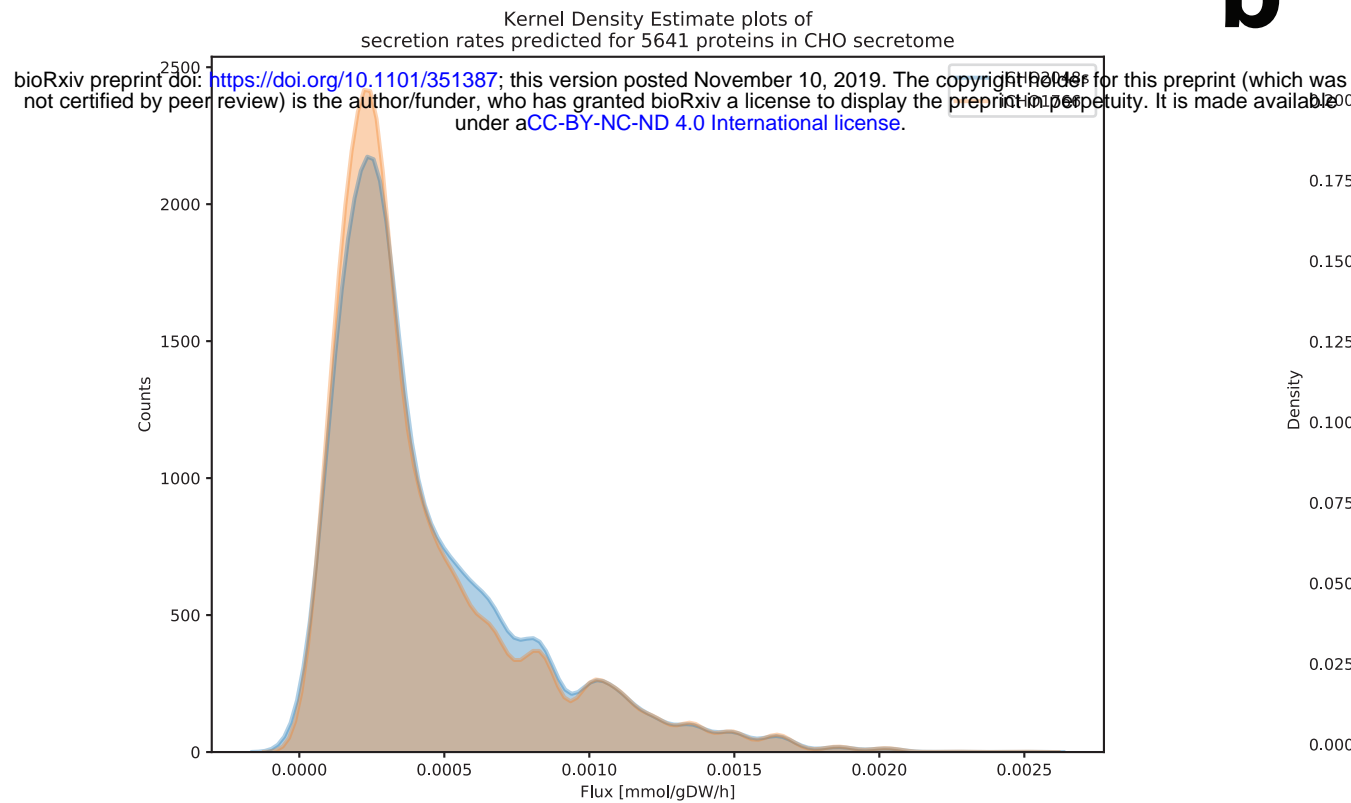**b**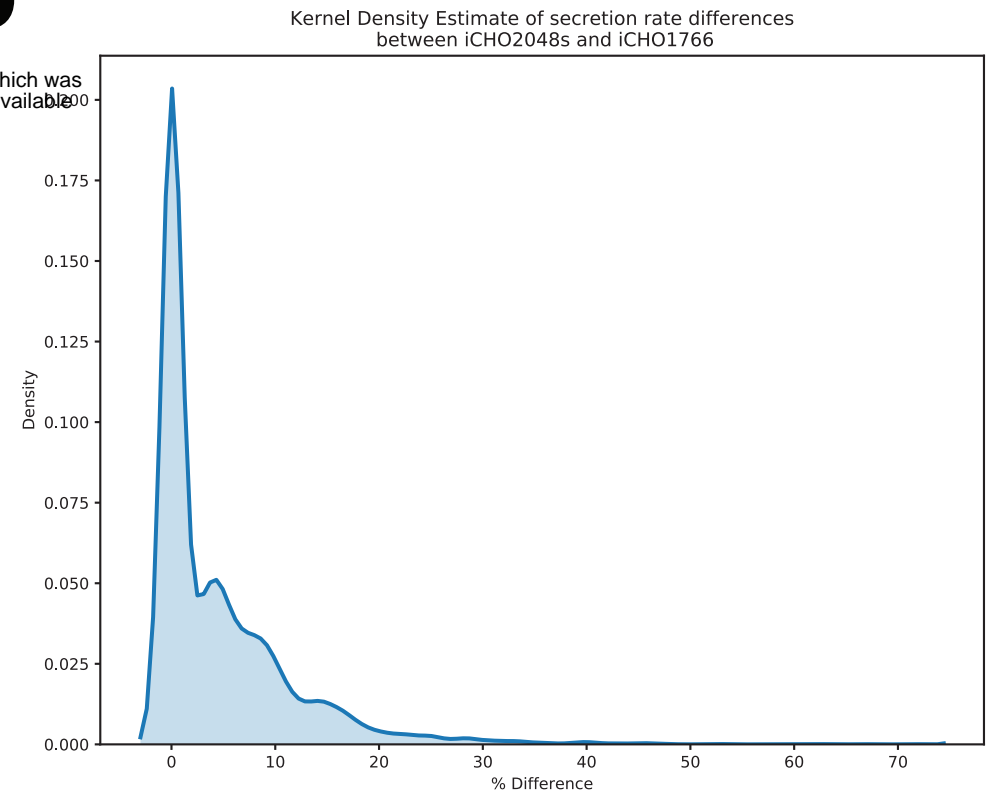**c**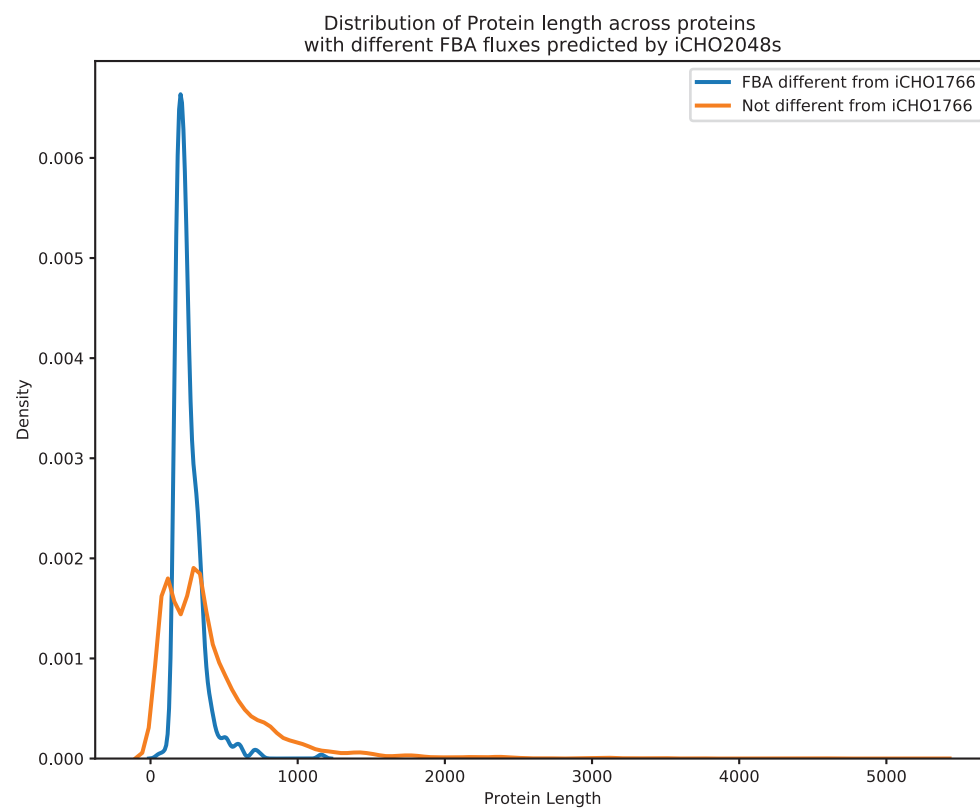**d**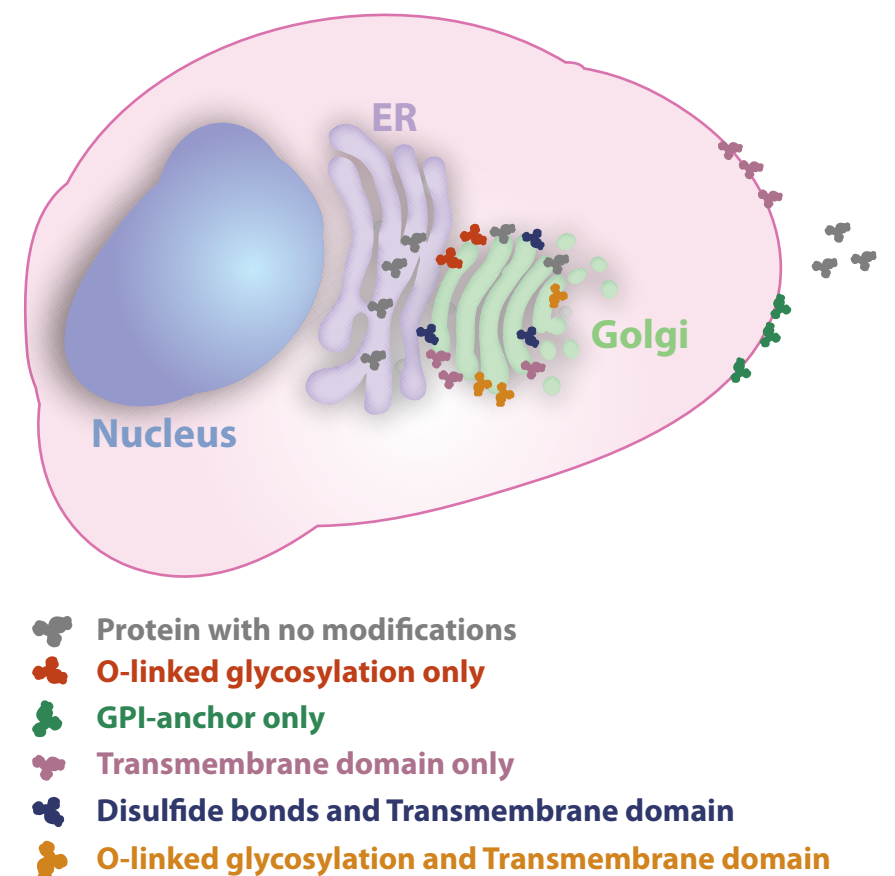

**Supplementary Figure 3 – Comparison of secretion rates predicted by iCHO2048s and iCHO1766.** Kernel Density Plots of (a) secretion rates for 5641 proteins in the CHO secretome, as computed with iCHO2048s (blue) and iCHO1766 (red), (b) the percentage difference between predictions with iCHO2048s and iCHO1766, and (c) the protein lengths (in units of amino acids in sequence) of proteins showing a secretion rate difference in both models (blue) or not (red). iCHO2048s predicts different fluxes for proteins with a specific post-translational modification profile, size, and localization. For about 8% of the target secretome, secretion rates predicted with iCHO2048s are at least 15% different from their iCHO1766 counterparts. Interestingly, this 8% corresponds to short (less than 350 amino acids) secreted proteins with O-linked glycans, GPI anchors or transmembrane domains whose final location is the extracellular space, the ER lumen, the Golgi membrane, or the plasma membrane, as summarized in (d). Thus, for a proportion of the secretome, there are non-negligible energetic and synthetic costs associated with vesicular transport, protein folding, and membrane anchoring only accounted for when iCHO2048s couples to metabolism. A detailed description of the results, as well as the source data, can be found in Jupyter Notebook E ([https://github.com/LewisLabUCSD/MammalianSecretoryRecon/JUPYTER\\_NOTEBOOKS](https://github.com/LewisLabUCSD/MammalianSecretoryRecon/JUPYTER_NOTEBOOKS)).

## Supplementary Discussion

### *Overview of the Secretory Pathway in animal cells*

Historically, most of the knowledge on the secretory pathway was obtained by studying protein transport processes and secretion in *Saccharomyces cerevisiae*<sup>1</sup>. Albeit quite similar in core functions, the secretory pathways of mammalian cells and fungi differ significantly in some of the steps which have been evolved based on species-specific secretion phenotypes<sup>2</sup>. The following paragraphs briefly overview the mammalian secretory pathway and highlights pathways exclusive to animals not present in fungi. The last section provides an in-depth comparison of the yeast and animal secretory pathways while highlighting the most important differences between both.

#### **Translocation and processing in endoplasmic reticulum**

Proteins destined to the secretory pathway generally bear a signal peptide at the amino-terminus which targets the proteins to the endoplasmic reticulum (ER) where the initial post-translational modifications (PTMs) take place. This transport requires translocating the target protein across the ER membrane through two general pathways: co-translational translocation (GTP dependent) and post-translational translocation (ATP dependent)<sup>3</sup>. An additional pathway for tail-anchored (TA) proteins into the ER membrane has also been discussed in the literature and included in our iCHO1921s reconstruction<sup>4,5</sup>. Once inside the ER lumen, the target proteins are folded by the action of several transmembrane ER proteins, including calnexin, calreticulin, and other luminal chaperones<sup>6-8</sup>. In the event of protein misfolding, a target protein may go through a “quality control” system (exclusive in the mammalian secretory pathway) that attempts to correct for folding errors<sup>9,10</sup>. However, if the misfolded state of the protein is sustained for too long, the protein then enters the ER associated degradation pathway, or ERAD, which involves retrotranslocation of the misfolded protein back to the cytosol, ubiquitination and proteasomal degradation<sup>11-13</sup>.

Besides folding, a target protein may acquire additional PTMs while inside the ER such as attachment of a glycosylphosphatidylinositol (GPI) anchor<sup>14,15</sup>, formation of disulfide bonds<sup>16</sup>, and N-linked glycosylation<sup>17-20</sup>. After these PTMs are successfully completed, the target proteins are transported to the Golgi apparatus via COPII-coated vesicles that bud from the ER<sup>21,22</sup> whereas misfolded proteins are retrotranslocated to the cytoplasm<sup>23,24</sup> for proteasomal degradation via the ER-associated degradation pathway (ERAD)<sup>25,26</sup>. In the Golgi apparatus, N-glycans are processed into branched and complex glycoforms and

proteins are further glycosylated with O-linked glycans<sup>27-29</sup> and then sorted to their final destination (e.g. lysosome, extracellular medium) via clathrin-coated secretory vesicles<sup>30-33</sup>.

### **A note on translocation pathways**

In co-translational translocation, proteins destined to the secretory pathway bear a hydrophobic signal sequence at the amino-terminus that promotes the targeting of ribosome-nascent chain (RNC) complexes to the ER via binding to the signal recognition particle (SRP). The SRP recognizes the signal peptide as soon as it emerges from the ribosome during translation. Then, the newly formed SRP-RNC complex is recognized by the SRP receptor on the ER membrane where translocation is initiated by interaction with the Sec61 complex (Sec61C) and assisted by the chaperone BiP to increase the efficiency and ensure the unidirectionality of this process<sup>30</sup>.

Post-translational translocation, in contrast to co-translational translocation, occurs independently of SRP and its receptor<sup>34</sup>. Furthermore, this process does not rely too heavily on the Sec61C to translocate the target protein and instead utilizes the protein Sec62 as a safe route that guarantees the efficient translocation of small proteins (<160 amino acids in length)<sup>35</sup>.

Finally, the pathway for inserting TA proteins into the ER membrane also occurs post-translationally due to the fact that the ER targeting signal of TA proteins is located very close to the carboxy-terminus, which allows the ribosome to release the protein before it is recognized and localized to the ER<sup>36</sup>. This pathway depends on ATP and one of the main players in the process is a transmembrane recognition complex known as TRC40 or Asna1<sup>37</sup>.

## **Important differences between the yeast and animal secretory pathways**

As mentioned above, core functions of the secretory pathway are conserved between mammalian and yeast cells. These core functions (see Table SD.2) are:

- Translocation through endoplasmic reticulum
- Primary glycosylation in ER (N-linked glycans) and Golgi (N-linked and O-linked glycans)
- Protein folding and quality control in ER
- Anterograde and retrograde vesicular transport between ER and Golgi via COPII and COPI vesicles, respectively.
- Dolichol pathway for N-linked core glycan translocation through the ER membrane

- Endoplasmic reticulum associated degradation (ERAD)
- GPI biosynthesis
- Unfolded protein response (UPR)

Nevertheless, minor and major differences exist between the yeast and mammalian secretory pathways. Some of these differences have been thoroughly reviewed before in an excellent review by Delic and colleagues<sup>2</sup> and are summarized in Table SD.1 below. Here, we highlight the major differences between both secretory pathways that are relevant for modeling purposes using the secretory reconstructions.

**Table SD.1 – Summary of differences between mammalian and yeast secretory pathways as described by Delic et al.<sup>2</sup>**

| <b>Description of difference</b>                            | <b>Mammalian secretory pathway</b>                                                                                    | <b>Yeast secretory pathway</b>                               | <b>Importance for modeling purposes</b> |
|-------------------------------------------------------------|-----------------------------------------------------------------------------------------------------------------------|--------------------------------------------------------------|-----------------------------------------|
| Chaperones involved in translocation                        | The main chaperone is BiP                                                                                             | The main chaperone is Kar2                                   | Minor                                   |
| Presence of heat-shock proteins (HSPs) in ER                | Mainly presence of proteins in the Hsp90 family                                                                       | Not found in yeast                                           | Minor                                   |
| Enzymes for detoxification of reactive oxygen species in ER | Contains several enzymes such as Ero1 and glutathione peroxidases                                                     | Not found in yeast                                           | Major                                   |
| Oxidation state of Protein disulfide isomerase (PDI)        | PDI is mainly reduced                                                                                                 | PDI is mainly oxidized                                       | Minor                                   |
| Components of calnexin-calreticulin cycle                   | Includes an enzyme coded by the UGGT gene to transfer glucose residues to core N-linked glycans in misfolded proteins | Lacks UGGT and instead directs misfolded proteins to ER exit | Major                                   |

|                                                        |                                                                                                                                  |                                                                                                                                |       |
|--------------------------------------------------------|----------------------------------------------------------------------------------------------------------------------------------|--------------------------------------------------------------------------------------------------------------------------------|-------|
| ERAD pathway branches for degrading misfolded proteins | Capable of directing misfolded proteins towards the ERAD pathway by trimming N-linked glycan residues in the A, B and C branches | Capable of directing misfolded proteins towards the ERAD pathway by trimming N-linked glycan residues only in B and C branches | Major |
| Components of COPII vesicles                           | Contains four isoforms of Sec24                                                                                                  | Expresses Sec24 with three cargo binding sites as well as Sec24 homologs Sfb2-3                                                | Minor |

Finally, the table below summarizes the differences between the mammalian and the fungal secretory pathway reconstructions in terms of components, reactions, and subsystems.

**Table SD.2 – Overview of main differences between the mammalian and yeast secretory pathway reconstructions**

| Secretory pathway reconstruction | Number of components | Number of reactions | Number of Subsystems | Core subsystems (in both mammalian and yeast secretory pathways)                                                                                            | Unique subsystems               |
|----------------------------------|----------------------|---------------------|----------------------|-------------------------------------------------------------------------------------------------------------------------------------------------------------|---------------------------------|
| Mammalian                        | 271                  | 144                 | 12                   | A total of 9 core subsystems: COPI, COPII, Dolichol pathway, ER glycosylation, ERAD, Golgi processing, GPI biosynthesis, Protein folding, and Translocation | Clathrin vesicles, GPI transfer |
| Yeast                            | 165                  | 137                 | 16                   |                                                                                                                                                             | ALP pathway, CPY pathway        |

## Supplementary References

1. Schekman, R. & Novick, P. 23 genes, 23 years later. *Cell* **116**, S13–5, 1 p following S19 (2004).
2. Delic, M. *et al.* The secretory pathway: exploring yeast diversity. *FEMS Microbiol. Rev.* **37**, 872–914 (2013).
3. Mandon, E. C., Trueman, S. F. & Gilmore, R. Protein translocation across the rough endoplasmic reticulum. *Cold Spring Harb. Perspect. Biol.* **5**, (2013).
4. Shao, S. & Hegde, R. S. Membrane Protein Insertion at the Endoplasmic Reticulum. *Annu. Rev. Cell Dev. Biol.* **27**, 25–56 (2011).
5. Borgese, N. & Fasana, E. Targeting pathways of C-tail-anchored proteins. *Biochim. Biophys. Acta - Biomembr.* **1808**, 937–946 (2011).
6. Gidalevitz, T., Stevens, F. & Argon, Y. Orchestration of secretory protein folding by ER chaperones. *Biochim. Biophys. Acta* **1833**, 2410–24 (2013).
7. Araki, K. & Nagata, K. Protein folding and quality control in the ER. *Cold Spring Harb. Perspect. Biol.* **3**, a007526 (2011).
8. Braakman, I. & Hebert, D. N. Protein folding in the endoplasmic reticulum. *Cold Spring Harb. Perspect. Biol.* **5**, a013201 (2013).
9. Sousa, M. & Parodi, A. J. The molecular basis for the recognition of misfolded glycoproteins by the UDP-Glc:glycoprotein glucosyltransferase. *EMBO J.* **14**, 4196–203 (1995).
10. Caramelo, J. J. & Parodi, A. J. Getting In and Out from Calnexin/Calreticulin Cycles. *J. Biol. Chem.* **283**, 10221–10225 (2008).
11. Xu, C. & Ng, D. T. W. Glycosylation-directed quality control of protein folding. *Nat. Rev. Mol. Cell Biol.* **16**, 742–752 (2015).
12. Xu, C., Wang, S., Thibault, G. & Ng, D. T. W. Futile Protein Folding Cycles in the ER Are Terminated by the Unfolded Protein O-Mannosylation Pathway. *Science (80-. ).* **340**, 978–981 (2013).
13. Olzmann, J. A., Kopito, R. R. & Christianson, J. C. The mammalian endoplasmic reticulum-associated degradation system. *Cold Spring Harb. Perspect. Biol.* **5**, (2013).
14. Ikezawa, H. Glycosylphosphatidylinositol (GPI)-anchored proteins. *Biol. Pharm. Bull.* **25**, 409–17 (2002).
15. Fujita, M. & Kinoshita, T. Structural remodeling of GPI anchors during biosynthesis and after attachment to proteins. *FEBS Lett.* **584**, 1670–1677 (2010).
16. Ron, D. & Harding, H. P. Protein-folding homeostasis in the endoplasmic reticulum and nutritional regulation. *Cold Spring Harb. Perspect. Biol.* **4**, (2012).
17. Ron, E. *et al.* Bypass of glycan-dependent glycoprotein delivery to ERAD by up-regulated

- EDEM1. *Mol. Biol. Cell* **22**, 3945–3954 (2011).
18. Mohorko, E., Glockshuber, R. & Aebi, M. Oligosaccharyltransferase: the central enzyme of N-linked protein glycosylation. *J. Inherit. Metab. Dis.* **34**, 869–878 (2011).
  19. Aebi, M., Bernasconi, R., Clerc, S. & Molinari, M. N-glycan structures: recognition and processing in the ER. *Trends Biochem. Sci.* **35**, 74–82 (2010).
  20. Aebi, M. N-linked protein glycosylation in the ER. *Biochim. Biophys. Acta - Mol. Cell Res.* **1833**, 2430–2437 (2013).
  21. Lord, C., Ferro-Novick, S. & Miller, E. A. The Highly Conserved COPII Coat Complex Sorts Cargo from the Endoplasmic Reticulum and Targets It to the Golgi. *Cold Spring Harb. Perspect. Biol.* **5**, a013367–a013367 (2013).
  22. Dancourt, J. & Barlowe, C. Protein Sorting Receptors in the Early Secretory Pathway. *Annu. Rev. Biochem.* **79**, 777–802 (2010).
  23. Bagola, K., Mehnert, M., Jarosch, E. & Sommer, T. Protein dislocation from the ER. *Biochim. Biophys. Acta - Biomembr.* **1808**, 925–936 (2011).
  24. Nakatsukasa, K., Brodsky, J. L. & Kamura, T. A stalled retrotranslocation complex reveals physical linkage between substrate recognition and proteasomal degradation during ER-associated degradation. *Mol. Biol. Cell* **24**, 1765–75, S1-8 (2013).
  25. Nakatsukasa, K., Kamura, T. & Brodsky, J. L. Recent technical developments in the study of ER-associated degradation. *Curr. Opin. Cell Biol.* **29**, 82–91 (2014).
  26. Hebert, D. N., Bernasconi, R. & Molinari, M. ERAD substrates: Which way out? *Semin. Cell Dev. Biol.* **21**, 526–532 (2010).
  27. Croset, A. *et al.* Differences in the glycosylation of recombinant proteins expressed in HEK and CHO cells. *J. Biotechnol.* **161**, 336–348 (2012).
  28. Moremen, K. W., Tiemeyer, M. & Nairn, A. V. Vertebrate protein glycosylation: diversity, synthesis and function. *Nat. Rev. Mol. Cell Biol.* **13**, 448–462 (2012).
  29. Stanley, P. Golgi glycosylation. *Cold Spring Harb. Perspect. Biol.* **3**, (2011).
  30. Bitsikas, V., Corrêa, I. R. & Nichols, B. J. Clathrin-independent pathways do not contribute significantly to endocytic flux. *Elife* **3**, e03970 (2014).
  31. Banfield, D. K. Mechanisms of Protein Retention in the Golgi. *Cold Spring Harb. Perspect. Biol.* **3**, a005264–a005264 (2011).
  32. Gannon, J., Bergeron, J. J. M. & Nilsson, T. Golgi and Related Vesicle Proteomics: Simplify to Identify. *Cold Spring Harb. Perspect. Biol.* **3**, a005421–a005421 (2011).
  33. Ispolatov, I. & Müsch, A. A model for the self-organization of vesicular flux and protein distributions in the Golgi apparatus. *PLoS Comput. Biol.* **9**, e1003125 (2013).

34. Johnson, N., Powis, K. & High, S. Post-translational translocation into the endoplasmic reticulum. *Biochim. Biophys. Acta - Mol. Cell Res.* **1833**, 2403–2409 (2013).
35. Lakkaraju, A. K. K. *et al.* Efficient secretion of small proteins in mammalian cells relies on Sec62-dependent posttranslational translocation. *Mol. Biol. Cell* **23**, 2712–2722 (2012).
36. Vilaridi, F., Lorenz, H. & Dobberstein, B. WRB is the receptor for TRC40/Asna1-mediated insertion of tail-anchored proteins into the ER membrane. *J. Cell Sci.* **124**, 1301–1307 (2011).
37. Stefanovic, S. & Hegde, R. S. Identification of a Targeting Factor for Posttranslational Membrane Protein Insertion into the ER. *Cell* **128**, 1147–1159 (2007).
